1           **Opioid use does not limit potent low-dose HIV-1 latency reversal agent boosting**

2

3 Tyler Lilie<sup>1</sup>†, Jennifer Bouzy<sup>1</sup>†, Archana Asundi<sup>2</sup>, Jessica Taylor<sup>2,3</sup>, Samantha Roche<sup>2</sup>, Alex  
4 Olson<sup>2</sup>, Kendyll Coxen<sup>1</sup>, Heather Corry<sup>1</sup>, Hannah Jordan<sup>1</sup>, Kiera Clayton<sup>4</sup>, Nina Lin<sup>2</sup>‡, Athe  
5 Tsibris<sup>1,5</sup>‡\*

6 † These authors contributed equally to this work

7 ‡ These authors contributed equally to this work

8

9   **Affiliations:**

10           <sup>1</sup>Brigham and Women’s Hospital, Boston, MA, USA.

11           <sup>2</sup>Department of Medicine, Boston University School of Medicine & Boston Medical  
12           Center, Boston, MA USA.

13           <sup>3</sup>Grayken Center for Addiction, Boston Medical Center, Boston, MA USA.

14           <sup>4</sup>Department of Pathology, University of Massachusetts T.H. Chan School of Medicine,  
15           Worcester, MA, USA.

16           <sup>5</sup>Harvard Medical School, Boston, MA, USA.

17           \*Corresponding author: [atsibris@bwh.harvard.edu](mailto:atsibris@bwh.harvard.edu)

18

19

20

21

22 **Abstract**

23 The combined effects of the HIV-1 and opioid epidemics on virus reservoir dynamics are less  
24 well characterized. To assess the impact of opioid use on HIV-1 latency reversal, we studied  
25 forty-seven suppressed participants with HIV-1 and observed that lower concentrations of  
26 combination latency reversal agents (LRA) led to synergistic virus reactivation *ex vivo*,  
27 regardless of opioid use. The use of a Smac mimetic or low-dose protein kinase C agonist,  
28 compounds that did not reverse latency alone, in combination with low-dose histone deacetylase  
29 inhibitors generated significantly more HIV-1 transcription than phorbol 12-myristate 13-acetate  
30 (PMA) with ionomycin, the maximal known HIV-1 reactivator. This LRA boosting did not differ  
31 by sex or race and associated with greater histone acetylation in CD4<sup>+</sup> T cells and modulation of  
32 T cell phenotype. Virion production and the frequency of multiply spliced HIV-1 transcripts did  
33 not increase, suggesting a post-transcriptional block still limits potent HIV-1 LRA boosting.

34

35

36

37

38

39

40

41

42

43

44

## 45 **Introduction**

46 HIV-1 proviral DNA remains integrated in CD4<sup>+</sup> T cells during suppressive antiretroviral  
47 therapy (ART) and is a barrier to cure. This virus reservoir is seeded within days of infection  
48 before symptoms develop<sup>1,2</sup>, persists<sup>3-5</sup>, decays slowly<sup>6</sup>, and can be maintained indefinitely<sup>7,8</sup>.  
49 The best approach to pursue HIV eradication remains uncertain. One strategy aims to  
50 pharmacologically reactivate latent HIV transcription in the setting of suppressive ART, induce  
51 virus protein production in infected cells, and then clear the reservoir, defined as cells that  
52 contain provirus capable of generating infectious virions, through immune-mediated  
53 mechanisms<sup>9-11</sup>. HIV-1 latency reversal agents (LRA) have advanced into clinical trials as  
54 monotherapy but with modest results; transient increases in virus mRNA production may be  
55 observed with some LRA but does not result in a decrease in reservoir size<sup>12-22</sup>. HIV-1 latency  
56 may be characterized by transcriptional blocks that cannot be overcome by single LRA<sup>23-26</sup>.

57 To address these limitations, novel classes and combinations of LRA have been studied<sup>27</sup>.  
58 Epigenetic LRA such as histone deacetylase inhibitors, when combined with protein kinase C  
59 agonists or second mitochondria-derived activator of caspase (Smac) mimetics, have been  
60 reported under some conditions to synergistically increase HIV-1 transcription in CD4<sup>+</sup> T cells  
61 isolated from treated suppressed participants with HIV, although the precise mechanism for this  
62 synergy is unknown<sup>28-32</sup>. The absolute amount of HIV-1 latency reversal, defined most  
63 commonly as induced levels of HIV-1 cell-associated RNA (caRNA), reported with combination  
64 LRA is significantly less than that observed with the maximal HIV-1 reactivator, phorbol 12-  
65 myristate 13-acetate (PMA) and ionomycin. The effects of combination LRA on multiple  
66 splicing of HIV-1 RNA has been less well studied. A trade-off may exist between maximum  
67 synergy and maximum efficacy in combination LRA approaches<sup>33</sup>.

68           People with HIV may be exposed to opioids, whether prescribed for chronic pain<sup>34</sup>,  
69   prescribed for opioid use disorder<sup>35</sup>, or injected as heroin<sup>36</sup> and have nearly double the risk of  
70   overdose compared to uninfected people who use opioids<sup>37</sup>. The pharmacology of opioids  
71   associated with substance use disorders may differ from opioid medications used to treat chronic  
72   pain. The  $\mu$  opioid agonists, e.g. heroin, fentanyl, and methadone, can block IL-2 mRNA and  
73   protein production in activated T cells through inhibition of AP-1, NFAT, and NF- $\kappa$ B activation,  
74   transcription factors known to be positive regulators of HIV transcription initiation<sup>38-40</sup>. The  
75   effects of buprenorphine, a partial  $\mu$  opioid agonist and  $\kappa$  and  $\delta$  opioid antagonist used in the  
76   treatment of opioid use disorder, on HIV-1 latency and its reversal have not been explored. A  
77   recent finding suggested that people with HIV who use opioids may have diminished responses  
78   to latency reversal<sup>41</sup>; LRA efficacy in this burgeoning patient population is understudied.

79           To investigate the mechanisms that control HIV-1 latency reversal during opioid use, we  
80   enrolled a cohort of thirty-six treated, virologically suppressed participants with HIV. We tested  
81   LRA combinations at concentrations lower than those typically assessed and identified the  
82   phenomenon of LRA boosting: synergistic HIV-1 transcriptional reactivation with small  
83   molecules that do not reverse latency as single agents. We corroborated these findings in an  
84   additional eleven participants from a separate cohort without opioid use and identified key  
85   associations between potent LRA boosting, increases in histone acetylation, modulation of T cell  
86   phenotype and function, and downstream blocks in HIV-1 virion production. Importantly, we  
87   find that opioid use did not limit the magnitude or mechanisms of LRA boosting.

88

89

90

## 91 **Results**

### 92 **Opioid use does not affect HIV-1 reservoir size**

93 We enrolled a cohort from a single academic center of thirty-six treated suppressed participants  
94 with HIV who used, or did not use, opioids in a 2:1 ratio. Participants had a median age of 59  
95 years, included one-third women, and were approximately 30% white (**Table 1**). The average  
96 duration of antiretroviral therapy was 12 years with a median duration of undetectable plasma  
97 HIV-1 RNA levels of over six years. Participant characteristics were further defined by type of  
98 opioid use (**Suppl. Table 1**) and validated by urine toxicology and self-reported substance use  
99 questionnaires (**Suppl. Fig. 1**). This cohort comprised participants who actively injected opioids  
100 (n=4), used methadone (n=4) or suboxone (n=12) as medication for opioid use disorder, or took  
101 opioids for chronic pain (n=4). Amphetamine and barbiturate use was not detected. All active  
102 injection opioid users had confirmatory urine toxicology screens positive for fentanyl (n=2 of 4,  
103 range 62 - >500 ng/mL) and/or norfentanyl (n=4 of 4 participants, range 46 - >500 ng/mL) and  
104 reported a median of 6 days of injection opioid use in the preceding 30 days (IQR 4-16 days)  
105 with a median of 7 days since the most recent use (IQR 4-14 days). All participants in the  
106 methadone, buprenorphine, and prescription opioid subgroups had urine toxicology positive for  
107 that substance.

108 To assess markers of HIV-1 persistence, we quantified total HIV-1 DNA and caRNA in  
109 PBMC and evaluated intact proviral reservoir size. Total HIV-1 DNA levels were similar  
110 between opioid and non-opioid groups, 2.36 vs 2.38 log<sub>10</sub> copies/10<sup>6</sup> PBMC, respectively, as  
111 were HIV-1 caRNA levels, 2.45 vs 2.52 log<sub>10</sub> copies/10<sup>6</sup> PBMC (**Fig. 1a**). Levels of intact  
112 provirus DNA were also similar between groups, 2.00 vs 1.82 log<sub>10</sub> copies/10<sup>6</sup> PBMC. To better  
113 define the intact proviral DNA reservoir, we characterized 5' and 3' HIV-1 deletions across

114 cohorts and opioid use subgroups (**Fig. 1b-c**). Similar proportions of intact 5' and 3' genetic  
115 regions were observed, irrespective of opioid use. The ratios of proviruses containing an intact 5'  
116 region and a defective (hypermutated) or deleted 3' region in HIV-1 *env* were statistically  
117 similar. An exploratory analysis demonstrated a greater proportion of total genomes were intact  
118 in active opioid users (**Fig. 1d**).

119

### 120 **LRA boosting markedly increases HIV-1 transcription**

121 To determine the effects of opioid use on HIV-1 latency reversal *ex vivo*, we isolated  
122 PBMC from all OPHION participants and tested a panel of ten LRA conditions (**Fig. 2**). The  
123 histone deacetylase inhibitors (HDACi) romidepsin (RMD) and panobinostat (PNB) were used at  
124 the lowest concentrations most commonly reported in the literature and the protein kinase C  
125 agonist bryostatin was tested at 1nM, one-tenth the most commonly reported concentration. In  
126 single LRA conditions, we observed a 2.7-fold activation of HIV-1 caRNA transcription, relative  
127 to an untreated DMSO-containing control, with  $\alpha$ CD3/ $\alpha$ CD28 beads (95% CI [2.2, 3.2]), a T cell  
128 receptor (TCR) agonist (**Fig. 2a**). Greater reactivation was observed with RMD (3.8-fold  
129 increase, 95% CI [3.2, 4.3]) when compared to PNB (2.6-fold increase, 95% CI [2.2, 3.0]). Low-  
130 dose bryostatin minimally increased unspliced HIV-1 caRNA levels (1.2-fold increase, 95% CI  
131 [1.1, 1.4]), but the Smac mimetic AZD5582, at a standard concentration<sup>42</sup>, did not (0.9-fold  
132 increase, 95% CI [0.8, 1.1]).

133 We next assessed LRA in combination. Incubation of PBMC with HDACi and either  
134 AZD5582 (AZD) or low-dose bryostatin potentiated HIV-1 latency reversal. AZD in  
135 combination with PNB or RMD increased HIV-1 caRNA levels 8.1-fold (95% CI [6.5, 9.2]) and  
136 9.1-fold (95% CI [7.4, 10.8]), respectively. Low-dose bryostatin with PNB increased HIV-1

137 caRNA 10.6-fold (95% CI [8.9, 12.2]), whereas the greatest fold-induction of HIV-1 caRNA was  
138 observed with the combination of low-dose bryostatin and RMD (13.2-fold, 95% CI [11.2,  
139 15.2]). Statistically greater HIV-1 RNA induction was observed with the LRA boosting  
140 combinations relative to HDACi monotherapy and TCR agonism, when corrected for multiple  
141 comparisons. We compared LRA response as a function of opioid use (**Fig. 2b**), sex (**Fig. 2c**),  
142 race (**Fig. 2d**), and ethnicity (**Suppl. Fig. 2**) and observed no statistically significant differences  
143 in the fold-changes of HIV-1 caRNA induction across these groups. In an exploratory analysis,  
144 the fold-change in HIV-1 caRNA varied by opioid use subgroup in response to T cell receptor  
145 agonism (**Fig. 2e**). Statistically significantly greater reactivation was observed in the suboxone  
146 sub-group when compared to active injection opioid users, the group with the smallest fold-  
147 change in  $\alpha$ CD3/ $\alpha$ CD28 bead-induced HIV-1 caRNA levels.

148

### 149 **LRA boosting modulates T cell activation and cytokine production**

150 To understand whether LRA exposure activates CD4<sup>+</sup> T cells, we assessed the  
151 upregulation of surface activation-induced markers (AIM)<sup>43</sup>. We leveraged dual-marker AIM  
152 assays (**Suppl. Fig. 3, Fig. 3a**), originally developed to detect T cell antigen responsiveness, to  
153 quantify cellular activation that occurs with LRA exposure, outside the context of peptide-  
154 specific recognition. Using TCR agonism as a positive control, responses were detected in 49%  
155 (95% CI [45, 54]), 32% (95% CI [28, 35]), and 42% (95% CI [36, 47]) of CD4<sup>+</sup> T cells in the  
156 OX40/PDL1, OX40/CD25, and CD69/CD40L AIM assays, respectively (**Fig. 3b**). Low-dose  
157 bryostatin significantly upregulated surface expression to more modest levels in all three AIM  
158 assays, relative to an untreated control condition. Bryostatin induced OX40/PDL1 surface  
159 expression in 5.2% of CD4<sup>+</sup> T cells (95% CI [3,4, 7.0]), levels of induction that did not

160 significantly change when used in combination with RMD (5.4%, 95% CI [3.3, 7.4]) or PNB  
161 (3.5%, 95% CI [2.1, 5.0]). Bryostatin monotherapy induced expression in 6.9% (95% CI [5.6,  
162 8.3]) and 2.6% (95% CI [2.0, 3.2]) of CD4s in the OX40/CD25 and CD69/CD40L AIM assays,  
163 respectively. In these two assays, the combination of RMD or PNB with low-dose bryostatin  
164 reduced activation-induced markers, relative to bryostatin alone, in some cases to undetectable  
165 levels; these findings did not differ by opioid use. The remainder of the LRA panel and their  
166 combinations did not upregulate surface expression in any AIM assay (**Suppl. Fig. 4a-c**).

167 We observed a more pronounced upregulation in isolated CD69 expression, an early  
168 activation marker, in response to LRA (**Fig. 3c**). Approximately 0.5% (95% CI [0.4, 0.7]) of  
169 untreated CD4<sup>+</sup> T cells expressed CD69 after 18 hours in culture. The proportion of cells  
170 expressing surface CD69 significantly increased to similar levels with TCR agonism (68.5%,  
171 95% CI [63.1, 73.9]) and low-dose bryostatin (72.9%, 95% CI [69.2, 76.5]). Whereas AZD5582  
172 (1.0%, 95% CI [0.7, 1.2]), RMD (4.7%, 95% CI [3.1, 6.3]), and PNB (5.4%, 95% CI [3.8, 7.0])  
173 modestly increased CD69 levels, combinations of these small molecules led to synergistic  
174 effects. Significantly greater induction of CD69 expression was observed when RMD or PNB  
175 was combined with bryostatin or AZD5582; a bryostatin combination induced more CD69 than  
176 an HDACi plus AZD5582. CD69 levels were statistically similar when comparing TCR  
177 agonism, bryostatin alone, and bryostatin in combination with either HDACi (**Suppl. Fig. 4d**).

178 To further assess LRA effects on T cell activation, we stained CD4<sup>+</sup> and CD8<sup>+</sup> T cells for  
179 intracellular cytokine production (**Fig. 3d-e**). We observed a cytokine production hierarchy in  
180 CD4s, where TNF- $\alpha$  > IL-2 > IFN- $\gamma$ , and in CD8s, where TNF- $\alpha$  > IFN- $\gamma$  > IL-2. In response to  
181 TCR agonism, significantly more CD4<sup>+</sup> T cells (CD4s) produce TNF- $\alpha$  (30.4%, 95% CI [27.5,  
182 33.4]) than IL-2 (14.3%, 95% CI [12.5, 16.1]) or IFN- $\gamma$  (6.0%, 95% CI [4.9, 7.1]), and



183 significantly more IL-2 than IFN- $\gamma$  (**Suppl. Fig. 4e**). We identified a different hierarchy in CD8<sup>+</sup>  
184 T cells (CD8s), where the proportion of cells producing TNF- $\alpha$  remained greatest (17.5%, 95%  
185 CI [13.9, 21.1]) but significantly more IFN- $\gamma$  (9.0%, 95% CI [7.1, 10.9]) was produced than IL-2  
186 (4.3%, 95% CI [2.8, 5.9]). Whereas HDACi monotherapy did not increase the proportion of  
187 CD4s or CD8s producing cytokines compared to an untreated control, low-dose bryostatin alone  
188 or in combination with HDACi significantly increased production of TNF- $\alpha$  and, to a smaller  
189 magnitude, IFN- $\gamma$  in CD4s. Significantly more CD4s produced TNF- $\alpha$  than IFN- $\gamma$  in response to  
190 RMD + bryostatin (4.5%, 95% CI [3.5, 5.6] versus 1.3%, 95% CI [0.9, 1.7]) and PNB +  
191 bryostatin (4.2%, 95% CI [3.4, 5.0] versus 1.7%, 95% CI [1.0, 2.4]). In CD8s, low-dose  
192 bryostatin significantly increased production of TNF- $\alpha$  (2.8%, 95% CI [1.9, 3.8]) and IFN- $\gamma$   
193 (1.5%, 95% CI [0.9, 2.0]). The proportions of CD8s that produced TNF- $\alpha$  and IFN- $\gamma$  when  
194 exposed to the combinations of RMD + bryostatin (3.4%, 95% CI [2.5, 4.4] versus 4.7%, 95% CI  
195 [2.8, 6.6]) and PNB + bryostatin (4.1%, 95% CI [2.9, 5.3] versus 4.6%, 95% CI [3.0, 6.3]) were  
196 similar. IL-2 production did not increase above 0.1% of CD4s or CD8s for any LRA, or  
197 combination, we tested. Cytokine production did not differ by opioid use (**Suppl. Fig. 5**).

198

### 199 **LRA boosting increases histone acetylation**

200 To investigate the mechanism(s) of LRA boosting, we next assessed histone acetylation.  
201 The proportions of acetylated histone H3<sup>+</sup> live CD4s were similar between untreated cells  
202 (19.7%, 95% CI [16.9, 22.4]) and cells exposed to RMD (21.8%, 95% CI [19.4, 24.3]), PNB  
203 (21.7%, 95% CI [19.3, 24.2]), or AZD (19.8%, 95% CI [17.1, 22.6]) and significantly increased  
204 after single-LRA exposure to  $\alpha$ CD3/ $\alpha$ CD28 beads (35.5%, 95% CI [32.7, 38.4]) and low-dose  
205 bryostatin (29.2%, 95% CI [25.7, 32.6]) (**Fig. 4a**). Low-dose bryostatin in combination with

206 either RMD (36.8%, 95% CI [32.1, 43.2]) or PNB (37.5%, 95% CI [31.8, 43.2]) significantly  
207 increased the proportions of CD4s contained acetylated histone H3. Interestingly, statistically  
208 significant increases in acetylated histone H3<sup>+</sup> live CD4s were also observed when combining  
209 LRA which individually did not affect acetylation, specifically RMD + AZD (30.0%, 95% CI  
210 [26.9, 33.1]) and PNB + AZD (29.8%, 95% CI [26.5, 33.0]). These results did not differ by  
211 opioid use (**Suppl. Fig 6a**).

212           Levels of acetylated histone H3, measured by median fluorescence intensity (MFI), were  
213 similar in untreated live CD4s and in cells cultured with  $\alpha$ CD3/ $\alpha$ CD28 beads, low-dose  
214 bryostatin, or AZD (**Fig. 4b**). Significant 3.4-fold and 3.3-fold increases in acetyl histone MFI  
215 were observed for RMD (21482, 95% CI [19014, 23951]) and PNB (21070, 95% CI [18727,  
216 23413]), respectively. AZD in combination with RMD or PNB further increased MFI by 6.1-  
217 fold and 5.7-fold, respectively. Absolute increases in MFI were observed for low-dose bryostatin  
218 in combination with RMD (25498, 95% CI [22772, 28225]) or PNB (27651, 95% CI [24729,  
219 30573]) but did not retain significance after correction for multiple comparisons. These results  
220 did not differ by opioid use (**Suppl. Fig 6b**). We observed no association between acetylated  
221 histone H3 MFI and fold-change in HIV-1 RNA levels for HDACi monotherapy or for HDACi  
222 in combination with AZD (**Fig 4c-d**). A statistically significant weak association between the  
223 proportion of acetyl histone H3<sup>+</sup> CD4s and fold-change in HIV-1 RNA levels was detected for  
224 HDACi in combination with bryostatin (**Fig 4e**).

225

## 226 **LRA boosting does not consistently induce virion production**

227           To extend our analyses from the OPHION cohort, we studied an additional eleven  
228 participants with HIV who did not use opioids, enrolled in the HEAL cohort (**Suppl. Table 2**).

229 We compared LRA boosting responses to the most potent known HIV-1 LRA, PMA in  
230 combination with ionomycin (PMA-iono). Significant fold-change increases in HIV-1  
231 transcription were observed with combinations of low-dose bryostatin with RMD (8.3-fold, 95%  
232 CI [7.2, 9.5]) or PNB (8.0-fold, 95% CI [6.9, 9.0]), when compared to RMD alone (3.4-fold,  
233 95% CI [2.6, 4.2]), PNB alone (3.1-fold, 95% CI [2.6, 3.6]), or PMA-iono (1.6-fold, 95% CI  
234 [1.4, 1.9]) (**Fig. 5a**). In separate experiments, we did not observe statistically greater HIV-1  
235 transcription with an HDACi in combination with AZD, relative to PMA-iono, in contrast to the  
236 results from the larger OPHION cohort (**Fig 5b**). No significant increases in HIV-1 transcription  
237 were observed in PBMC experiments with low-dose bryostatin (1.0-fold, 95% CI 0.9 – 1.1) or  
238 AZD (1.2-fold, 95% CI 0.6 – 1.9). Similar magnitudes of HIV-1 transcriptional reactivation were  
239 seen with HDACi monotherapy, low-dose bryostatin, and AZD monotherapy across the  
240 OPHION and HEAL cohorts we studied. We evaluated human reference gene transcription  
241 during LRA treatment and observed decreases with HDACi exposure, increases with PMA-iono,  
242 and variable changes with bryostatin (**Suppl. Fig. 7**).<sup>44,45</sup>

243 To assess the magnitude of HIV-1 latency reversal as a function of cell type, we next  
244 performed parallel experiments in PBMC and total CD4<sup>+</sup> T cells (**Fig. 5c**). Levels of HIV-1  
245 caRNA were, on average, 4.3-fold higher (range 3.2 – 6.0) across experimental conditions  
246 performed in CD4<sup>+</sup> T cells, when compared to PBMC, and varied by 1.6 log<sub>10</sub> (PBMC) and 1.8  
247 log<sub>10</sub> (CD4) across participant samples in the absence of LRA. To control for absolute caRNA  
248 differences, we determined fold-changes in LRA response and observed statistically significant  
249 increases in HIV-1 caRNA with low-dose bryostatin in combination with RMD or PNB, when  
250 compared to PMA-iono, in both PBMC and CD4s (**Fig. 5d**). To explore the variance in LRA  
251 response, we compiled per-participant biological replicate measurements (**Suppl. Fig. 8a**).

252 Supernatant HIV-1 RNA levels increased after 24hr incubation of PBMC with PMA-iono (19  
253 copies/mL, 95% CI [10, 32]) and the combinations of RMD plus bryostatin (27 copies/mL, 95%  
254 CI [11, 34]) or AZD (31 copies/mL, 95% CI [14, 43]), and PNB plus bryostatin (35 copies/mL,  
255 95% CI [19, 60]) or AZD (12 copies/mL, 95% CI [8.1, 26]), when compared to untreated PBMC  
256 (3.0 copies/mL, 95% CI [2.2, 6.9]), but these results were not statistically significant after  
257 correction for multiple comparisons (**Fig. 5e**). This virion production response was biphasic. For  
258 each LRA condition, PBMC samples from at least 5 of 10 participants showed no increases in  
259 HIV-1 RNA levels over control; these were most commonly the same participants. Additionally,  
260 no significant increases in LRA-induced virion production in CD4<sup>+</sup> T cell cultures were  
261 observed. Notably, greater virion production in untreated CD4s and greater absolute magnitudes  
262 of supernatant viremia in LRA treated CD4s were noted, relative to PBMC, but were again  
263 driven by increases from a subset of participants. To investigate the nature of this post-  
264 transcriptional block more precisely, we quantified the frequency of CD4s with inducible  
265 multiply spliced HIV-1 RNA transcripts (**Fig. 5f**)<sup>46</sup>. No significant increases in HIV-1 *tat/rev*  
266 transcripts were observed with RMD in combination with bryostatin at either 1nM or 10nM  
267 concentrations. In a post-hoc analysis, we combined datasets from OPHION and HEAL  
268 participants, including LRA conditions common to both sets of experiments, and observed  
269 statistically significant increases in HIV-1 unspliced RNA transcription with all LRA boosting  
270 combinations (**Fig. 5g**). The variance in LRA response increased as the magnitude of fold change  
271 in HIV-1 caRNA increased (**Suppl. Fig 8b**).

272

273

274

## 275 Discussion

276 Opioid use is complex and can be accompanied by comorbidities, such as immune  
277 activation with injection drug use<sup>47,48</sup>, that may impact the HIV-1 reservoir and its persistence  
278<sup>45,49-52</sup>. Here, we found no effects of opioid use by indication, type, or pharmacology on markers  
279 of HIV-1 persistence. In the setting of persistently suppressed viremia, opioid use was less likely  
280 to modulate virus reservoir size. While our OPHION study participants were older than opioid  
281 users experiencing the greatest number of overdose deaths<sup>53</sup>, they do reflect an age more typical  
282 for patients with HIV who engage in research locally. Overall, participants were matched on the  
283 duration of ART and the duration of virus suppression, key variables that have been associated  
284 with HIV-1 reservoir size,<sup>54</sup> and our urine toxicology results were consistent with the  
285 participants' ascribed opioid use group. We found that opioid use generally did not impact LRA  
286 responsiveness, in contrast to a recent smaller study<sup>41</sup>. Our relatively large sample size allowed  
287 us to determine that this potency was less likely to be affected by sex, race, or ethnicity.

288 We used these samples to identify and characterize the phenomenon of LRA boosting:  
289 improving the potency of HDACi beyond that of PMA-ionomycin by combining with a 2<sup>nd</sup> drug  
290 that does not, by itself, re-activate HIV-1 transcription. This boosting occurred at lower LRA  
291 concentrations, here at least half the RMD and 1/10<sup>th</sup> the bryostatin concentrations used in prior  
292 combination studies<sup>28-31</sup>. The specific synergistic latency reversal effects of low-dose bryostatin  
293 and romidepsin was previously identified in samples from four participants with HIV<sup>28</sup>. Here we  
294 confirm those findings in a larger sample size and extend the observation to HDACi more  
295 generally. While AZD5582 monotherapy induced virus transcription in tissues from animal  
296 models, we observed no HIV-1 latency reversal, at an identical dose, in PBMC isolated from the  
297 47 participants we tested<sup>42</sup>. We observed greater *ex vivo* LRA efficacy of HDACi monotherapy,

298 relative to AZD5582. In this regard, our findings agree with a recent study that assessed a higher  
299 AZD5582 concentration, although this study did not identify HDACi-AZD synergy, relative to  
300 HDACi monotherapy, using higher LRA concentrations<sup>32</sup>. Interestingly, the fold-change in  
301 HIV-1 RNA levels that we observed with PMA-ionomycin were orders of magnitude lower than  
302 some prior studies<sup>28,32</sup>. Here, we calculated levels of HIV-1 caRNA copy number in response to  
303 LRA on a per-cell basis, rather than the induction of HIV-1 transcripts on a weight basis, per  $\mu\text{g}$   
304 of RNA. These differences did not appear to be a function of the cell type used for latency  
305 reversal, PBMC versus total CD4<sup>+</sup> T cells, and it remains unclear if assay technicalities or  
306 quantification methodology may contribute.

307         The use of two HDACi in our panel of ten LRA conditions increased the generalizability  
308 of the findings we observed with this drug class. Similar magnitudes of boosting were observed  
309 with RMD and PNB and suggests that class I histone deacetylase inhibition may be more  
310 relevant to this phenomenon<sup>55</sup>. LRA boosting correlated with increased histone H3 acetylation  
311 in CD4<sup>+</sup> T cells but AZD-associated boosting did not recruit additional CD4s with acetylated  
312 histone H3. HDACi monotherapy also did not increase the proportions of acetylated histone H3-  
313 positive CD4s and the amount of acetylated histone H3 per cell did not meaningfully correlate  
314 with the induction of HIV-1 transcription. It remains unclear if histone acetylation is correlative  
315 or causative to virus reactivation. In the context of cellular genes, histone acetylation is not an  
316 immediate driver of the transcriptional changes observed with HDACi<sup>56</sup>. Similar magnitudes of  
317 HIV-1 reactivation were observed with low-dose bryostatin- and AZD5582-mediated HDACi  
318 boosting and could share common mechanisms. Bryostatin and AZD5582 can activate canonical  
319 and non-canonical NF- $\kappa$ B pathways, respectively, and the overlap in signaling with LRA  
320 boosting requires further definition.

321 LRA boosting, and their individual components, can have off-target effects. Whereas  
322 CD69 surface expression has been proposed as a biomarker of latency reversal potency in the  
323 context of PKC agonists, we found no correlation between CD69 upregulation and the magnitude  
324 of latency reversal <sup>57</sup>. Low-dose bryostatatin was sufficient to increase surface activation-induced  
325 markers and increase cytokine production in CD4<sup>+</sup> and CD8<sup>+</sup> T cells, albeit to relatively low  
326 levels, either alone or in combination with HDACi. Our results confirm and extend previous  
327 findings on the effects of combination LRA on T lymphocytes <sup>58</sup>. In contrast, LRA boosting  
328 with AZD5582 resulted in relatively lower surface levels of CD69 and no induction of surface  
329 activation markers or cytokine production in T cells. An LRA boosting approach that minimizes  
330 immune modulatory effects may be more appealing as an investigational intervention.

331 The variance in HIV-1 LRA responsiveness we document, across participants and  
332 replicates, has implications for future studies. Small studies may be limited in their capacity to  
333 accurately quantify this variability, which increases with LRA potency. Assessments of LRA  
334 activity should prioritize larger sample sizes and more than one biological replicate per  
335 participant. We found that normalization of HIV-1 transcription to host gene transcription may  
336 introduce additional variability. Despite HIV-1 re-activation that was superior to PMA-  
337 ionomycin, multiply spliced HIV-1 transcription and virion production did not increase with  
338 LRA boosting. Blocks to HIV-1 splicing are increasingly recognized, and here we extend those  
339 findings to novel LRA boosting combinations <sup>23-25,59-61</sup>. Future work must focus on the post-  
340 transcriptional mechanisms of HIV-1 RNA processing and inter-patient differences in LRA  
341 responsiveness, which facilitate virion production during TCR agonism and treatment with  
342 PMA-ionomycin and which may not be active during HIV-1 latency or LRA boosting.

343 Our study has limitations. Prior and current injection opioid use limits the peripheral  
344 blood draw volumes we could obtain; this required us to prioritize experiments with a given  
345 sample. The statistical significance of LRA boosting with AZD5582-containing regimens was  
346 not replicated in our HEAL cohort samples and it is unclear if this relates to the variability in  
347 LRA response as sample size decreases or to unrecognized differences between our cohort's  
348 participants. Additional mechanisms are likely to explain how LRA boosting increases virus  
349 transcription. Bryostatin may exert its HIV-1 latency reversal effects independently of PKC  
350 agonism <sup>62</sup>.

351 The use of HIV-1 LRA at sub-maximal doses and in combination with small molecules  
352 that do not increase virus transcription, *ex vivo*, expands our understanding of how virus latency  
353 may be reversed. Follow-on studies should delineate the precise mechanisms required for  
354 efficient virus RNA processing and virion production and identify new discovery targets for  
355 future development.

356

### 357 **Acknowledgements**

358 This work is supported by the National Institutes of Health (NIH) R61 DA047038 (NL and AT)  
359 and R33 DA047038 (AT) and was facilitated by the Providence/Boston Center for AIDS  
360 Research (P30AI042853) and the Harvard University Center for AIDS Research (P30AI060354).  
361 The project described was further supported by Clinical Translational Science Award  
362 1UL1TR002541-01 to Harvard University and Brigham and Women's Hospital from the  
363 National Center for Research Resources. The content is solely the responsibility of the authors  
364 and does not necessarily represent the official views of the National Center for Research  
365 Resources or the National Institutes of Health.



366 **References**

- 367 1. Chun, T.W., *et al.* Early establishment of a pool of latently infected, resting CD4(+) T  
368 cells during primary HIV-1 infection. *Proceedings of the National Academy of Sciences*  
369 *of the United States of America* **95**, 8869-8873 (1998).
- 370 2. Whitney, J.B., *et al.* Rapid seeding of the viral reservoir prior to SIV viraemia in rhesus  
371 monkeys. *Nature* **512**, 74-77 (2014).
- 372 3. Wong, J.K., *et al.* Recovery of replication-competent HIV despite prolonged suppression  
373 of plasma viremia. *Science (New York, N.Y)* **278**, 1291-1295 (1997).
- 374 4. Chun, T.W., *et al.* Presence of an inducible HIV-1 latent reservoir during highly active  
375 antiretroviral therapy. *Proceedings of the National Academy of Sciences of the United*  
376 *States of America* **94**, 13193-13197 (1997).
- 377 5. Finzi, D., *et al.* Latent infection of CD4+ T cells provides a mechanism for lifelong  
378 persistence of HIV-1, even in patients on effective combination therapy. *Nature medicine*  
379 **5**, 512-517 (1999).
- 380 6. Siliciano, J.D., *et al.* Long-term follow-up studies confirm the stability of the latent  
381 reservoir for HIV-1 in resting CD4+ T cells. *Nature medicine* **9**, 727-728 (2003).
- 382 7. Chomont, N., *et al.* HIV reservoir size and persistence are driven by T cell survival and  
383 homeostatic proliferation. *Nature medicine* **15**, 893-900 (2009).
- 384 8. Mullins, J.I. & Frenkel, L.M. Clonal Expansion of Human Immunodeficiency Virus-  
385 Infected Cells and Human Immunodeficiency Virus Persistence During Antiretroviral  
386 Therapy. *The Journal of infectious diseases* **215**, S119-S127 (2017).
- 387 9. Deeks, S.G., *et al.* International AIDS Society global scientific strategy: towards an HIV  
388 cure 2016. *Nature medicine* (2016).

- 389 10. Ferrari, G., Pollara, J., Tomaras, G.D. & Haynes, B.F. Humoral and Innate Antiviral  
390 Immunity as Tools to Clear Persistent HIV Infection. *The Journal of infectious diseases*  
391 **215**, S152-S159 (2017).
- 392 11. Riley, J.L. & Montaner, L.J. Cell-Mediated Immunity to Target the Persistent Human  
393 Immunodeficiency Virus Reservoir. *The Journal of infectious diseases* **215**, S160-S171  
394 (2017).
- 395 12. McMahon, D.K., *et al.* A Phase 1/2 Randomized, Placebo-Controlled Trial of  
396 Romidespin in Persons With HIV-1 on Suppressive Antiretroviral Therapy. *The Journal*  
397 *of infectious diseases* **224**, 648-656 (2021).
- 398 13. Scully, E.P., *et al.* Impact of Tamoxifen on Vorinostat-Induced Human  
399 Immunodeficiency Virus Expression in Women on Antiretroviral Therapy: AIDS  
400 Clinical Trials Group A5366, The MOXIE Trial. *Clin Infect Dis* **75**, 1389-1396 (2022).
- 401 14. Gutierrez, C., *et al.* Bryostatins for latent virus reactivation in HIV-infected patients on  
402 antiretroviral therapy. *AIDS (London, England)* **30**, 1385-1392 (2016).
- 403 15. Archin, N.M., *et al.* HIV-1 expression within resting CD4+ T cells after multiple doses of  
404 vorinostat. *The Journal of infectious diseases* **210**, 728-735 (2014).
- 405 16. Archin, N.M., *et al.* Administration of vorinostat disrupts HIV-1 latency in patients on  
406 antiretroviral therapy. *Nature* **487**, 482-485 (2012).
- 407 17. Elliott, J.H., *et al.* Activation of HIV transcription with short-course vorinostat in HIV-  
408 infected patients on suppressive antiretroviral therapy. *PLoS pathogens* **10**, e1004473  
409 (2014).
- 410 18. Sogaard, O.S., *et al.* The Depsipeptide Romidepsin Reverses HIV-1 Latency In Vivo.  
411 *PLoS pathogens* **11**, e1005142 (2015).

- 412 19. Rasmussen, T.A., *et al.* Panobinostat, a histone deacetylase inhibitor, for latent-virus  
413 reactivation in HIV-infected patients on suppressive antiretroviral therapy: a phase 1/2,  
414 single group, clinical trial. *The lancet. HIV* **1**, e13-21 (2014).
- 415 20. Routy, J.P., *et al.* Valproic acid in association with highly active antiretroviral therapy for  
416 reducing systemic HIV-1 reservoirs: results from a multicentre randomized clinical study.  
417 *HIV medicine* **13**, 291-296 (2012).
- 418 21. Sagot-Lerolle, N., *et al.* Prolonged valproic acid treatment does not reduce the size of  
419 latent HIV reservoir. *AIDS (London, England)* **22**, 1125-1129 (2008).
- 420 22. Archin, N.M., *et al.* Interval dosing with the HDAC inhibitor vorinostat effectively  
421 reverses HIV latency. *The Journal of clinical investigation* **127**, 3126-3135 (2017).
- 422 23. Yukl, S.A., *et al.* HIV latency in isolated patient CD4(+) T cells may be due to blocks in  
423 HIV transcriptional elongation, completion, and splicing. *Science translational medicine*  
424 **10**(2018).
- 425 24. Moron-Lopez, S., *et al.* Characterization of the HIV-1 transcription profile after  
426 romidepsin administration in ART-suppressed individuals. *AIDS (London, England)* **33**,  
427 425-431 (2019).
- 428 25. Zerbato, J.M., *et al.* Multiply spliced HIV RNA is a predictive measure of virus  
429 production ex vivo and in vivo following reversal of HIV latency. *EBioMedicine* **65**,  
430 103241 (2021).
- 431 26. Martin, H.A., *et al.* New Assay Reveals Vast Excess of Defective over Intact HIV-1  
432 Transcripts in Antiretroviral Therapy-Suppressed Individuals. *Journal of virology* **96**,  
433 e0160522 (2022).

- 434 27. Rodari, A., Darcis, G. & Van Lint, C.M. The Current Status of Latency Reversing Agents  
435 for HIV-1 Remission. *Annu Rev Virol* **8**, 491-514 (2021).
- 436 28. Laird, G.M., *et al.* Ex vivo analysis identifies effective HIV-1 latency-reversing drug  
437 combinations. *The Journal of clinical investigation* **125**, 1901-1912 (2015).
- 438 29. Pache, L., *et al.* BIRC2/cIAP1 Is a Negative Regulator of HIV-1 Transcription and Can  
439 Be Targeted by Smac Mimetics to Promote Reversal of Viral Latency. *Cell host &*  
440 *microbe* **18**, 345-353 (2015).
- 441 30. Grau-Exposito, J., *et al.* Latency reversal agents affect differently the latent reservoir  
442 present in distinct CD4+ T subpopulations. *PLoS pathogens* **15**, e1007991 (2019).
- 443 31. Pardons, M., Fromentin, R., Pagliuzza, A., Routy, J.P. & Chomont, N. Latency-  
444 Reversing Agents Induce Differential Responses in Distinct Memory CD4 T Cell Subsets  
445 in Individuals on Antiretroviral Therapy. *Cell Rep* **29**, 2783-2795 e2785 (2019).
- 446 32. Dai, W., *et al.* Genome-wide CRISPR screens identify combinations of candidate latency  
447 reversing agents for targeting the latent HIV-1 reservoir. *Science translational medicine*  
448 **14**, eabh3351 (2022).
- 449 33. Gupta, V. & Dixit, N.M. Trade-off between synergy and efficacy in combinations of  
450 HIV-1 latency-reversing agents. *PLoS computational biology* **14**, e1006004 (2018).
- 451 34. Edelman, E.J., *et al.* Receipt of opioid analgesics by HIV-infected and uninfected  
452 patients. *J Gen Intern Med* **28**, 82-90 (2013).
- 453 35. Reddon, H., *et al.* Methadone maintenance therapy decreases the rate of antiretroviral  
454 therapy discontinuation among HIV-positive illicit drug users. *AIDS Behav* **18**, 740-746  
455 (2014).

- 456 36. Tavitian-Exley, I., Vickerman, P., Bastos, F.I. & Boily, M.C. Influence of different drugs  
457 on HIV risk in people who inject: systematic review and meta-analysis. *Addiction* **110**,  
458 572-584 (2015).
- 459 37. Green, T.C., McGowan, S.K., Yokell, M.A., Pouget, E.R. & Rich, J.D. HIV infection and  
460 risk of overdose: a systematic review and meta-analysis. *AIDS (London, England)* **26**,  
461 403-417 (2012).
- 462 38. Borner, C., Kraus, J., Bedini, A., Schraven, B. & Hollt, V. T-cell receptor/CD28-  
463 mediated activation of human T lymphocytes induces expression of functional mu-opioid  
464 receptors. *Mol Pharmacol* **74**, 496-504 (2008).
- 465 39. Borner, C., *et al.* Mechanisms of opioid-mediated inhibition of human T cell receptor  
466 signaling. *J Immunol* **183**, 882-889 (2009).
- 467 40. Mbonye, U. & Karn, J. Transcriptional control of HIV latency: Cellular signaling  
468 pathways, epigenetics, happenstance and the hope for a cure. *Virology* (2014).
- 469 41. Basukala, B., *et al.* Virally Suppressed People Living with HIV Who Use Opioids Have  
470 Diminished Latency Reversal. *Viruses* **15**(2023).
- 471 42. Nixon, C.C., *et al.* Systemic HIV and SIV latency reversal via non-canonical NF-kappaB  
472 signalling in vivo. *Nature* **578**, 160-165 (2020).
- 473 43. Reiss, S., *et al.* Comparative analysis of activation induced marker (AIM) assays for  
474 sensitive identification of antigen-specific CD4 T cells. *PLoS ONE* **12**, e0186998 (2017).
- 475 44. Ceriani, C., *et al.* Defining stable reference genes in HIV latency reversal experiments.  
476 *Journal of virology* **95**(2021).

- 477 45. Gandhi, R.T., *et al.* Levels of HIV-1 persistence on antiretroviral therapy are not  
478 associated with markers of inflammation or activation. *PLoS pathogens* **13**, e1006285  
479 (2017).
- 480 46. Procopio, F.A., *et al.* A Novel Assay to Measure the Magnitude of the Inducible Viral  
481 Reservoir in HIV-infected Individuals. *EBioMedicine* **2**, 874-883 (2015).
- 482 47. Mehandru, S., *et al.* Behavioural, Mucosal and Systemic Immune Parameters in HIV-  
483 infected and Uninfected Injection Drug Users. *J Addict Res Ther* **6**, 1-8 (2015).
- 484 48. Deren, S., Cleland, C.M., Lee, H., Mehandru, S. & Markowitz, M. Brief Report: The  
485 Relationship Between Injection Drug Use Risk Behaviors and Markers of Immune  
486 Activation. *Journal of acquired immune deficiency syndromes (1999)* **75**, e8-e12 (2017).
- 487 49. Khoury, G., *et al.* Human Immunodeficiency Virus Persistence and T-Cell Activation in  
488 Blood, Rectal, and Lymph Node Tissue in Human Immunodeficiency Virus-Infected  
489 Individuals Receiving Suppressive Antiretroviral Therapy. *The Journal of infectious*  
490 *diseases* **215**, 911-919 (2017).
- 491 50. Massanella, M., Fromentin, R. & Chomont, N. Residual inflammation and viral  
492 reservoirs: alliance against an HIV cure. *Current opinion in HIV and AIDS* **11**, 234-241  
493 (2016).
- 494 51. Ruggiero, A., *et al.* During Stably Suppressive Antiretroviral Therapy Integrated HIV-1  
495 DNA Load in Peripheral Blood is Associated with the Frequency of CD8 Cells  
496 Expressing HLA-DR/DP/DQ. *EBioMedicine* **2**, 1153-1159 (2015).
- 497 52. Cockerham, L.R., *et al.* CD4+ and CD8+ T cell activation are associated with HIV DNA  
498 in resting CD4+ T cells. *PLoS ONE* **9**, e110731 (2014).

- 499 53. Spencer, M.R., Minino, A.M. & Warner, M. Drug Overdose Deaths in the United States,  
500 2001-2021. *NCHS Data Brief*, 1-8 (2022).
- 501 54. Bachmann, N., *et al.* Determinants of HIV-1 reservoir size and long-term dynamics  
502 during suppressive ART. *Nat Commun* **10**, 3193 (2019).
- 503 55. Milazzo, G., *et al.* Histone Deacetylases (HDACs): Evolution, Specificity, Role in  
504 Transcriptional Complexes, and Pharmacological Actionability. *Genes (Basel)* **11**(2020).
- 505 56. Halsall, J.A., Turan, N., Wiersma, M. & Turner, B.M. Cells adapt to the epigenomic  
506 disruption caused by histone deacetylase inhibitors through a coordinated, chromatin-  
507 mediated transcriptional response. *Epigenetics Chromatin* **8**, 29 (2015).
- 508 57. Marsden, M.D., *et al.* In vivo activation of latent HIV with a synthetic bryostatin analog  
509 effects both latent cell "kick" and "kill" in strategy for virus eradication. *PLoS pathogens*  
510 **13**, e1006575 (2017).
- 511 58. Walker-Sperling, V.E., Pohlmeier, C.W., Tarwater, P.M. & Blankson, J.N. The Effect of  
512 Latency Reversal Agents on Primary CD8+ T Cells: Implications for Shock and Kill  
513 Strategies for Human Immunodeficiency Virus Eradication. *EBioMedicine* **8**, 217-229  
514 (2016).
- 515 59. Wedrychowski, A., *et al.* Transcriptomic Signatures of Human Immunodeficiency Virus  
516 Post-Treatment Control. *Journal of virology* **97**, e0125422 (2023).
- 517 60. Moron-Lopez, S., *et al.* Human splice factors contribute to latent HIV infection in  
518 primary cell models and blood CD4+ T cells from ART-treated individuals. *PLoS*  
519 *pathogens* **16**, e1009060 (2020).

- 520 61. Mota, T.M., *et al.* Integrated Assessment of Viral Transcription, Antigen Presentation,  
521 and CD8(+) T Cell Function Reveals Multiple Limitations of Class I-Selective Histone  
522 Deacetylase Inhibitors during HIV-1 Latency Reversal. *Journal of virology* **94**(2020).
- 523 62. Mbonye, U., Leskov, K., Shukla, M., Valadkhan, S. & Karn, J. Biogenesis of P-TEFb in  
524 CD4+ T cells to reverse HIV latency is mediated by protein kinase C (PKC)-independent  
525 signaling pathways. *PLoS pathogens* **17**, e1009581 (2021).
- 526 63. McLellan, A.T., *et al.* The Fifth Edition of the Addiction Severity Index. *J Subst Abuse*  
527 *Treat* **9**, 199-213 (1992).
- 528 64. Institute of Behavioral Research. Texas Christian University Drug Screen 5. Fort Worth:  
529 Texas Christian University, Institute of Behavioral Research (2020)  
530 (<https://ibr.tcu.edu/forms/tcu-drug-screen/>).
- 531 65. Malnati, M.S., *et al.* A universal real-time PCR assay for the quantification of group-M  
532 HIV-1 proviral load. *Nature protocols* **3**, 1240-1248 (2008).
- 533 66. Bruner, K.M., *et al.* A quantitative approach for measuring the reservoir of latent HIV-1  
534 proviruses. *Nature* **566**, 120-125 (2019).
- 535
- 536
- 537
- 538
- 539
- 540
- 541
- 542



543 **Table 1. OPHION Participant Characteristics**

| Characteristic                         | Cohort        |              | Total*       |
|----------------------------------------|---------------|--------------|--------------|
|                                        | Non-Opioid    | Opioid       |              |
| Participants, N                        | 12            | 24           | 36           |
| Age                                    |               |              |              |
| Median (IQR) <sup>†</sup>              | 56 (50-61)    | 61 (55-65)   | 59 (54-65)   |
| Sex                                    |               |              |              |
| Male N (%)                             | 7 (58%)       | 17 (71%)     | 24 (67%)     |
| Race                                   |               |              |              |
| Black N (%)                            | 10 (83%)      | 6 (25%)      | 16 (44%)     |
| White N (%)                            | 2 (17%)       | 9 (38%)      | 11 (31%)     |
| Hispanic/Latino** N (%)                | 0             | 2 (8%)       | 2 (6%)       |
| American Indian N (%)                  | 0             | 1 (4%)       | 1 (3%)       |
| Declined/NA                            | 0             | 6 (25%)      | 6 (17%)      |
| Ethnicity                              |               |              |              |
| Non-Hispanic N (%)                     | 11 (92%)      | 13 (54%)     | 24 (67%)     |
| Hispanic N (%)                         | 1 (8%)        | 11 (46%)     | 12 (33%)     |
| Duration of ART (months)               |               |              |              |
| Median (IQR)                           | 162 (106-204) | 136 (91-173) | 144 (97-179) |
| Duration of viral suppression (months) |               |              |              |
| Median (IQR)                           | 69.5 (38-91)  | 79 (51-94)   | 75 (44-93)   |

544 \*Percentage totals may not add up to 100 due to rounding. <sup>†</sup>IQR, interquartile range. \*\*Participants may  
 545 identify as Hispanic/Latino either in response to a question about their race, or a follow-up question on  
 546 ethnicity. Participants who reported Hispanic ethnicity identified their race as either “White” or  
 547 “Declined/Not Available.”

548

549

550

551

552

553 **Figure Legends**

554

555 **Figure 1.** HIV-1 reservoir size and intactness during opioid use. Quantifications were performed  
556 on participants who used (n=24) or did not use (n=12) opioids. (a) HIV-1 persistence measures  
557 in participants with (blue circles) and without (yellow circles) opioid use are shown. Data are  
558 displayed on a logarithmic y-axis scale; DNA and RNA was extracted from 5 million PBMC.  
559 Intact DNA was quantified with the IPDA assay. Mean values  $\pm$  standard errors of the mean  
560 (SEM) are shown. (b) 5' and 3' genomic deletions as a function of opioid use, mean values  $\pm$   
561 95% CIs are displayed, (c) Opioid subgroup analysis. The reservoir size of intact, 5' deleted, and  
562 3' deleted or hypermutated regions are shown. (d) The proportion of intact genomes as a function  
563 of DNA copies and opioid use subgroup. Cohort 1, injection opioid use; cohort 2, prescribed oral  
564 opioids for pain; cohort 3, methadone; cohort 4, suboxone; cohort 5, no opioid use.

565

566 **Figure 2.** HIV-1 latency reversal in OPHION participants. HIV-1 caRNA levels were quantified  
567 after 24-hour incubations using 5 million PBMC and compared to a no-drug DMSO-containing  
568 condition. Mean values and the 95% CIs are shown. (a) Combined data showing LRA responses  
569 in thirty-six total participants with (blue circles) or without (yellow circles) opioid use. Data  
570 from (a) was dichotomized by (b) opioid use, (c) sex (light purple circles, male; light grey  
571 circles, female), and (d) race (light green circles, Black and American Indian; dark green circles,  
572 white). (e) Opioid-use subgroup analysis highlighting LRA response to  $\alpha$ CD3/ $\alpha$ CD28 beads  
573 from (a), as a function of opioid use subgroup. Means and SEM are shown. Dotted horizontal  
574 line denotes a fold-change of 1. \*p<0.05, \*\* p<0.01, \*\*\* p<0.001, and \*\*\*\* p<0.0001 for LRA  
575 combinations, corrected for multiple comparisons.  $\alpha$ CD3/ $\alpha$ CD28, anti-CD3 anti-CD28

576 superparamagnetic beads; RMD, romidepsin; PNB, panobinostat; R, RMD 20nM; P, PNB  
577 30nM; B, bryostatin 1nM; A, AZD5582 100nM.

578

579 **Figure 3.** Immune activation and cytokine induction during *ex vivo* LRA boosting. (a) Example  
580 plots of OX40<sup>+</sup>PD-L1<sup>+</sup>, OX40<sup>+</sup>CD25<sup>+</sup>, and CD69<sup>+</sup>CD40L<sup>+</sup> expression from live CD4<sup>+</sup> T cells in  
581 PBMC samples incubated with DMSO control or an  $\alpha$ CD3/ $\alpha$ CD28 bead positive control for 18  
582 hours, (b) Violin plots of surface activation-induced marker (AIM) response as a function of  
583 LRA,. Results across three highly sensitive AIM assays for OPHION participants' samples  
584 (n=36) are shown for comparison, (c) Quantification of LRA-induced surface CD69 expression  
585 in live total CD4<sup>+</sup> T cells (n=36). Intracellular production of the cytokines TNF- $\alpha$ , IFN- $\gamma$ , and IL-  
586 2 during LRA exposure in (d) live CD4<sup>+</sup> and (e) CD8<sup>+</sup> T cells (n=36). Violin plot median values  
587 are indicated by a solid black line; quartiles are shown with a dotted line. LRA conditions  
588 without visible bars represent values < 0.1% of cells. \*p<0.05, \*\*\* p<0.001, and \*\*\*\* p<0.0001  
589 for LRA combinations, corrected for multiple comparisons. RMD, romidepsin; PNB,  
590 panobinostat; R, RMD 20nM; P, PNB 30nM; B, bryostatin 1nM; A, AZD5582 100nM.

591

592 **Figure 4.** Histone H3 acetylation patterns during LRA exposure. (a) Violin plots showing the  
593 proportion of live total CD4<sup>+</sup> T cells with acetylated histone H3, assessed by flow cytometry, (b)  
594 Violin plot of mean fluorescence intensity (MFI) of acetylated histone H3 per live CD4<sup>+</sup> T cell.  
595 Scatter plots of acetylated histone H3 levels per CD4 as a function of HIV-1 transcription in  
596 response to (c) RMD and PNB monotherapy, (d) LRA boosting with HDACi and AZD5582, and  
597 (e) HDACi in combination with low-dose bryostatin are shown. Acetylated histone levels and  
598 HIV-1 reactivation with the combinations of HDACi and bryostatin were moderately positively

599 correlated ( $r=.25$ ,  $p=.04$ ). Violin plot median values are indicated by a solid black line; quartiles  
600 are shown with a dotted line.

601

602 **Figure 5.** Comparative analysis of LRA boosting effects in PBMC and CD4<sup>+</sup> T cells.

603 Leukapheresis samples from HEAL cohort participants ( $n=11$ ) were used to assess HIV-1

604 unspliced caRNA levels during (a) low-dose bryostatin-based and (b) AZD5582-based LRA

605 boosting combinations, when compared to PMA-ionomycin. Data are presented as means  $\pm$

606 SEM. Circle color is used to denote a given HEAL participant across Figure panels. (c) Absolute

607 HIV-1 unspliced caRNA levels in parallel PBMC and CD4<sup>+</sup> T cell LRA exposures. PBMC and

608 CD4 results are separated by a vertical dotted line. (d) Representation of the data in (c) as fold-

609 change in HIV-1 caRNA levels. (e) Corresponding HIV-1 RNA levels from culture supernatants.

610 (f) Multiply spliced HIV-1 RNA levels as determined in a modified TILDA assay, comparing

611 RMD-bryostatin combinations at two bryostatin concentrations to PMA-ionomycin. (g)

612 Combined OPHION and HEAL participant results ( $n=47$ ) that summarize PBMC LRA boosting

613 responses, for LRA conditions common to both datasets. Results from OPHION participant

614 samples, carried over from Fig. 2a, are shown in grey circles. HEAL participant results are

615 shown in color. \* $p<0.05$ , \*\*  $p<0.01$ , \*\*\*  $p<0.001$ , \*\*\*\*  $p<0.0001$ , corrected for multiple

616 comparisons. NDC, no-drug control, contains 0.2% DMSO; PMAi, PMA with ionomycin; RMD,

617 romidepsin; PNB, panobinostat; R, RMD 20nM; P, PNB 30nM; B, bryostatin 1nM; A,

618 AZD5582 100nM.

619

620

621

## 622 **Supplementary Figures Legends**

623 **Supplementary Figure 1.** Substance use in the OPHION cohort. We assessed substance  
624 use by (a) clinical urine toxicology testing and (b) self-reported substance use questionnaires.  
625 Substance use results are separated by cohort groups by participant ID. Red squares indicate the  
626 presence of that substance in a urine sample; unavailable data were marked with “X” in a gray  
627 box. An expanded opiate panel was performed to assess for the presence of different opiate  
628 formulations. Color squares in panel b reflect any reported use by participants in the last 30 days.  
629 The numbers inside a given box indicate the number of days used this substance was reported to  
630 be used in the last 30 days. Gradient of color from blue to red indicate increasing report of use  
631 whereas white indicates no use. Concomitant use of alcohol, tobacco, marijuana, and gabapentin  
632 in the OPHION cohort was common. \*all fentanyl measures were confirmed by follow-on  
633 quantification. Participants in the buprenorphine and methadone groups reported daily use of the  
634 respective medication in the 30 days prior, whereas participants taking opioids for chronic pain  
635 took opioids for 27-30 days in the 30 days preceding their enrollment in OPHION. 75% (N=3/4)  
636 of active injection users had urine toxicology screens positive for cocaine corresponding with  
637 self-report; all three reported smoking cocaine in the prior 30 days to specimen collection. One  
638 of twelve participants in the methadone use group and 2/12 in the non-opiate use group also has  
639 urine toxicology screens positive for cocaine. All active injection opioid users reported using  
640 multiple drugs on the same day in the last 30 days compared to 1/12 participants in non-opioid  
641 use group and 10/20 participants in methadone, buprenorphine and prescription opiate use  
642 groups combined. N=3/4 active injection opioid users reported smoking marijuana in the last 30  
643 days. 6 and 8 participants about the 12 participants in opioid use groups had urine toxicology  
644 screens positive for benzodiazepines and gabapentin; all but 1 in both cases reported that this

645 substance was prescribed. No participant had urine toxicology screens positive for amphetamines  
646 or barbiturates. All participants injecting opioids used tobacco in the preceding 30 days and,  
647 overall, 23 of 36 OPHION participants used tobacco within the month prior to their blood  
648 collection. 25% (N=6/24) of opioid use participants consumed alcohol in last 30 days compared  
649 to 58% (7/12) in the control group.

650

651 **Supplementary Figure 2.** HIV-1 LRA boosting response in the OPHION cohort by ethnicity.  
652 HIV-1 fold-increase in unspliced RNA transcription plotted as a function of self-reported  
653 Hispanic (dark purple circles) or non-Hispanic (light blue circles) ethnicity.

654

655 **Supplementary Figure 3.** Flow cytometry gating strategies. Representative intracellular  
656 cytokine staining plots for (a) control and (b)  $\alpha$ CD3/ $\alpha$ CD28 bead-exposed PBMC are shown. (c)  
657 AIM assay and gating strategy and representative flow plots for control and  $\alpha$ CD3/ $\alpha$ CD28 bead-  
658 exposed PBMC.

659

660 **Supplementary Figure 4.** LRA-induced immune activation as a function of opioid use. Results  
661 obtained with the (a) OX40/PD-L1, (b) OX40/CD25, and (c) CD69/CD40L AIM assays are  
662 reported for all ten conditions in the LRA panel, where samples from participants with (blue  
663 circles) and without (yellow circles) opioid use are shown. Data are represented as means  $\pm$  95%  
664 CIs. The highest measured levels in OX40/PDL1 assay with bryostatin 1nM, R+B, and P+B are  
665 the same non-opioid-using participant. (d) Individual data points for CD69<sup>+</sup> live total CD4<sup>+</sup> T  
666 cells, as a function of opioid use. (e) Comparative hierarchies of intracellular cytokine  
667 production in CD4<sup>+</sup> and CD8<sup>+</sup> T cells exposed to  $\alpha$ CD3/ $\alpha$ CD28 beads. Data displayed in these

668 panels are identical to the data values shown in Main Fig. 3. \* $p < 0.05$ , \*\*  $p < 0.01$ , \*\*\*\*  $p < 0.0001$ ,  
669 corrected for multiple comparisons. TNF, tumor necrosis factor-alpha; IFN, interferon-gamma;  
670 IL-2, interleukin-2; CD4, CD4<sup>+</sup> T cells; CD8, CD8<sup>+</sup> T cells.

671  
672 **Supplementary Figure 5.** Intracellular cytokine production, as a function of opioid use. Using  
673 the same data displayed in Main Fig. 3, here we show individual data points, labelled as samples  
674 from participants with (blue circles) and without (yellow circles) opioid use. CD4<sup>+</sup> T cell  
675 production of (a) TNF- $\alpha$ , (b) IL-2, and (c) IFN- $\gamma$ . CD8<sup>+</sup> T cell production of (d) TNF- $\alpha$ , (e) IFN-  
676  $\gamma$ , (f) IL-2. No significant differences in cytokine production were observed by opioid use.

677  
678 **Supplementary Figure 6.** Histone acetylation effects during LRA boosting, as a function of  
679 opioid use. Using the same data displayed in Main Fig. 4, here we show individual data points,  
680 labelled as samples from participants with (blue circles) and without (yellow circles) opioid use.  
681 (a) The proportion of live total CD4<sup>+</sup> T cells with acetylated histone H3, assessed by flow  
682 cytometry, (b) Mean fluorescence intensity (MFI) of acetylated histone H3 per live total CD4<sup>+</sup> T  
683 cells.

684  
685 **Supplementary Figure 7.** The effects of LRA boosting on human reference gene transcription.  
686 Using leukapheresis samples from HEAL participants (n=9), we assessed and compared fold-  
687 changes in transcription of three host genes: (a) IPO8, (b) TBP, and (c) UBE2D2. Reference  
688 gene multiplexing was validated for (d) TBP and (e) UBE2D2 quantifications. The rationale to  
689 study these three reference genes is as follows. IPO8 transcription is used as an internal control  
690 by the AIDS Clinical Trials Group's Virology Specialty Laboratories to measure RNA integrity

691 in a dichotomous way. IPO8 Ct values >27 are used to suggest degradation of cellular samples in  
692 storage, and samples with IPO8 Ct >27 do not report HIV-1 RNA values. Recent work by  
693 Nancie Archin at the UNC HIV Cure Center identified TBP and UBE2D2 as two of the more  
694 stable host genes during LRA exposures, which included PMA, AZD5582, and HDACi, among a  
695 panel of eight LRA.

696

697 **Supplementary Figure 8.** Variance in LRA response. (a) Magnitude of HIV-1 caRNA  
698 transcription fold-changes in biological replicate LRA experiments performed with HEAL  
699 leukapheresis samples, derived from the data displayed in Main Fig 5a-c, (b) Box and whiskers  
700 plot displaying the data of Fig. 5g as the mean (solid black horizontal line), inter-quartile range  
701 (25<sup>th</sup> – 75<sup>th</sup> percentiles denoted as the borders of the vertical rectangle), and 5<sup>th</sup>-95<sup>th</sup> percentiles  
702 (whiskers, error bars). Values below and above the whiskers are shown as individual data points.  
703 PMA-iono, PMA with ionomycin; RMD, romidepsin; PNB, panobinostat; R, RMD 20nM; P,  
704 PNB 30nM; B, bryostatin 1nM; A, AZD5582 100nM.

705

706 **Supplementary Tables**

707 **Supplementary Table 1** – Breakdown of OPHION cohort into opioid use subgroups

708 **Supplementary Table 2** – HEAL Participant Characteristics

709

710

711

712

713



714 **Online Methods**

715 **Study Design and Clinical Cohorts**

716 The Opioids, HIV, and Translation (OPHION) study is a prospective cohort study of participants  
717 living with HIV on suppressive antiretroviral therapy recruited from Boston Medical Center  
718 which serves one of the largest populations of people living with HIV (PLWH) in Massachusetts,  
719 including a disproportionately large number of persons with opioid and substance use disorders.  
720 Eligible PLWH were required to currently be on antiretroviral therapy and virologically  
721 suppressed (defined as undetectable plasma HIV-1 RNA or <20 copies/ml) for a minimum of 12  
722 months prior to enrollment. Individuals were recruited into 1 of 5 cohorts: (1) active injection  
723 opioid use, defined as self-report on injecting opioids at least once per week, (2) Methadone  
724 maintenance therapy for at least 3 months, (3) buprenorphine-naloxone therapy for at least 3  
725 months, (4) Prescription oral opioid use for at least 6 months or (5) No opioid use within the past  
726 1 year representing a control cohort. Eligibility into each of the five cohorts was confirmed with  
727 a urine toxicology performed at the BMC central laboratory, which includes evaluation for urine  
728 drug metabolites including opiates and non-opioid substances as well as an expanded opioid  
729 panel which included fentanyl or norfentanyl metabolites. Exclusionary criteria included ongoing  
730 immunosuppression and pregnancy; patients who reported injecting non-opioid substances were  
731 also not eligible. Once consented and enrolled, each participant underwent blood collection for  
732 same day PBMC extraction as well as urine collection for gabapentin and benzodiazepine  
733 metabolites. Participants also completed an extensive survey on their current and prior substance  
734 use (including alcohol and tobacco use) based the addiction severity index (ASI)<sup>63</sup> and Texas  
735 Christian University (TCU) drug screen<sup>64</sup>. HIV and other clinical information including ART

736 treatment history, duration of virologic suppression and comorbidity status including hepatitis C  
737 and B were abstracted from the medical record.

738 The HIV Eradication and Latency (HEAL) Cohort is a longitudinal biorepository study of  
739 participants with HIV. Inclusion criteria for HEAL participants in this study were 1) ART-treated  
740 participants with HIV-1 who were virologically suppressed, defined as plasma HIV-1 RNA less  
741 than assay (most commonly less than 20 copies/mL, without blips) for >1 year and 2) had  
742 sufficient available amounts of cryopreserved PBMC for the proposed analyses. These cohort  
743 studies are performed in accordance with the principles of the Declaration of Helsinki. The  
744 institutional review boards at Boston Medical Center and Brigham and Women's Hospital (Mass  
745 General Brigham Human Research Committee) approved the study protocols. Written informed  
746 consent was obtained from all participants. Experimenters were blinded to all clinical data and to  
747 OPHION subgroup assignments.

748

#### 749 **Quantification of HIV-1 persistence markers**

750 Genomic DNA and total RNA were isolated from approximately  $5 \times 10^6$  peripheral blood  
751 mononuclear cells (PBMC) or total CD4<sup>+</sup> T cells (AllPrep DNA/RNA kit, Qiagen). Total HIV-1  
752 DNA and unspliced cell-associated RNA (caRNA) levels were quantified in triplicate by real-  
753 time PCR as previously described, modified to include Taqman Universal Mastermix (DNA) or  
754 Taqman Fast Virus 1-Step Mastermix (RNA) <sup>65</sup>. HIV-1 quantifications used forward primer 5'-  
755 TACTGACGCTCTCGCACC-3', reverse primer 5'-TCTCGACGCAGGACTCG-3', and probe  
756 5' FAM-CTCTCTCCTTCTAGCCTC-MGB 3' (ThermoFisher Scientific). DNA cycling  
757 conditions in a total reaction volume of 25 $\mu$ L were 95°C for 15 min followed by 40 cycles of  
758 95°C for 15 sec and 60°C for 1 min. RNA cycling conditions in a total reaction volume of 20 $\mu$ L

759 were 55°C for 15 min, 95°C for 20 sec, followed by 40 cycles of 95°C for 3 sec and 60°C for 30  
760 sec. Approximately 500ng of genomic DNA were assessed per well. The limits of quantification  
761 for total HIV-1 DNA and unspliced caRNA were 1 and 3 copies per reaction, respectively.  
762 Limits of detection were calculated per timepoint and participant sample, considering the  
763 average number of copies detected across triplicate measurements. Cell input numbers were  
764 quantified by human genome equivalents of CCR5 DNA using forward primer 5'-  
765 ATGATTCCTGGGAGAGACGC-3', reverse primer 5'-AGCCAGGACGGTCACCTT-3', and  
766 probe 5' FAM-CTCTCTCCTTCTAGCCTC-MGB 3' (ThermoFisher Scientific) as described <sup>65</sup>.

767

#### 768 **Intact proviral DNA assay**

769 HIV-1 DNA from isolated PBMC DNA was measured using the intact proviral DNA assay  
770 (IPDA) <sup>66</sup>. Briefly, a multiplex droplet digital PCR assay was performed using primer and probe  
771 sets targeting the Psi packaging signal and env regions of the HIV-1 genome using 700 ng DNA  
772 per well. Intact provirus genomes were indicated in double positive droplets whereas incomplete  
773 genomes were single positive and classified as either 5' (Psi-/env+) or 3' (Psi+/env-) deletions.  
774 Quantified proviral sequences were normalized to cell number reference gene RPP30 and  
775 expressed as copies per million PBMC. Data was generated using the Bio-Rad QX200 Droplet  
776 Digital PCR system and analyzed using QuantaSoft Data Analysis Software.

777

#### 778 **Multiply spliced HIV-1 transcripts**

779 To measure the frequency of total CD4<sup>+</sup> T cells with inducible multiply spliced HIV-1 RNA, we  
780 performed the TILDA assay, as previously described, with two modifications <sup>46</sup>. First, to reduce  
781 the 95% CIs around our frequency estimates, we used 36 x 10<sup>6</sup> cells/mL as our first dilution,

782 rather than the  $18 \times 10^6$  cells/mL used in Procopio, et al. Second, to harmonize our PMA-  
783 ionomycin concentrations with LRA experiments, we reduced the PMA concentration from its  
784 original 100 ng/mL to 50ng/mL in our TILDA assays. The duration of virologic suppression in  
785 our HEAL participants was similar to previously reported participants <sup>46</sup>.

786

### 787 **Reference gene quantification**

788 Extracted PBMC RNA was used to quantify transcription levels of three host genes, IPO8, TBP,  
789 and UBE2D2, typically immediately after the loading of HIV-1 caRNA qPCR plates was  
790 complete. IPO8 quantifications used forward primer 5'- CCTTTGTACAACAGAAGGCAC -3',  
791 reverse primer 5'- TGCACGTCTCAGGTTTTTGC -3', and probe 5' FAM-  
792 TCCGCATAAATCCATTGATTCTGC -MGB 3' (ThermoFisher Scientific); TBP  
793 quantifications used forward primer 5'- CAGTGAATCTTGGTTGTAAACTTGA -3', reverse  
794 primer 5'- TCGTGGCTCTCTTATCCTCAT -3', and probe 5' FAM-  
795 CGCAGCAAACCGCTTGGGATTAT -MGB 3' (ThermoFisher Scientific); and UBE2D2  
796 quantifications used forward primer 5'- GTACTCTTGTCATCTGTTCTCTG -3', reverse  
797 primer 5'- CCATTCCCGAGCTATTCTGTT -3', and probe 5' VIC-  
798 CCGAGCAATCTCAGGCACTAAAGGA -MGB 3' (ThermoFisher Scientific). To generate  
799 IPO8 standards, we cloned a fragment corresponding to nucleotides 3636-3707 of IPO8 mRNA  
800 (Sequence ID NM\_006390.4) into a pCR4-TOPO vector (ThermoFisher Scientific, Cat. No.  
801 K458001). To generate TBP standards, a fragment corresponding to nucleotides 649-1037 of  
802 TBP mRNA (Sequence ID NM\_003194) was cloned into a pCR4-TOPO vector. To generate  
803 UBE2D2 standards, a fragment corresponding to nucleotides 729-1164 of UBE2D2 mRNA  
804 (Sequence ID NM\_181838.2) was cloned into a pCR4-TOPO vector. Reference gene RNA was

805 synthesized using T3 Megascript Kit (ThermoFisher Cat. No. AM1333 and cleaned (RNease  
806 MinElute Cleanup Kit, Qiagen, Cat. No. 74204) before serially diluting across a range of  $10^6$  –  
807  $10^3$  copies per well. After TBP and UBE2D2 standards were individually validated, TBP (T)  
808 and UBE2D2 (U) RNA were diluted separately and aliquoted together as one set of multiplex  
809 standards. T and U standards were validated to demonstrate overlap of individual and  
810 multiplexed standards curves. The assay was optimized to run all host gene standards and  
811 samples on one 96-well reaction plate in a total reaction volume of 20 $\mu$ L using cycling  
812 conditions of 55°C for 5 min, 95°C for 20 sec, followed by 40 cycles of 95°C for 3 sec and 56°C  
813 for 30 sec. Reference gene standards and samples were run in duplicate. IPO8, TBP, and  
814 UBE2D2 RNA copies per million PBMC were calculated by dividing copies per total sample by  
815 number of cells per sample, determined by CCR5 quantification, and normalized to  $1 \times 10^6$  cells.  
816 Fold changes were calculated by dividing the RNA copy number obtained per million PBMC for  
817 each LRA condition by the 0.2% DMSO control condition's reference gene RNA copies/million  
818 PBMC.

819

## 820 **HIV-1 latency reversal**

821 OPHION and HEAL participant peripheral blood mononuclear cells (PBMC) were isolated from  
822 large volume (90 – 180cc) peripheral blood or leukapheresis collections by density centrifugation  
823 and cryopreserved. Cryopreserved PBMC were thawed, pelleted, and transferred to RPMI media  
824 supplemented with 10% fetal bovine serum, 2  $\mu$ M raltegravir, and 2  $\mu$ M tenofovir (R10 +  
825 TDF/RAL) at a concentration of  $1 \times 10^6$  cells/mL. Cells were rested in a humidified CO<sub>2</sub>  
826 incubator at 37°C for three hours (hrs). After 3hrs, cells were counted and assessed for viability.  
827 For CD4<sup>+</sup> T cell experiments, PBMC were pelleted, resuspended in EasySep Buffer (StemCell

828 Technologies, cat. no. 20144), and isolated with EasySep Human CD4<sup>+</sup> T Cell Enrichment Kit  
829 (StemCell cat. no. 19052) per the manufacturer's instructions. A total of 5x10<sup>6</sup> PBMC, or total  
830 CD4<sup>+</sup> T cells, were aliquoted into 5mL of fresh R10 + RAL/TDF in 6-well sterile cell culture  
831 plates. Cells were incubated in the presence or absence of the following LRA conditions: 0.2%  
832 DMSO, 1:1  $\alpha$ CD3/ $\alpha$ CD28 beads (Life Technologies, cat. no. 11131D) to cells with 30 U/mL IL-  
833 2 (R&D Systems, cat. no. 202-IL-500), romidepsin 20 nM (Sigma, cat. no. SML1175),  
834 panobinostat 30nM (Sigma, cat. no. SML3060), bryostatin-1 1nM (Sigma, cat. no. B7431),  
835 AZD5582 100nM (ChemieTek, cat. no. CT-A5582), romidepsin 20 nM plus bryostatin-1 1nM,  
836 panobinostat 30nM plus bryostatin-1 1nM 100nM, romidepsin 20 nM plus AZD5582 100nM,  
837 panobinostat 30nM plus AZD5582 100nM, and phorbol 12-myristate 13-acetate (PMA)  
838 50ng/mL (Sigma, cat. no. P1585) in combination with ionomycin 1 $\mu$ M (Sigma, cat. no. I9657).  
839 To provide a known positive control for subsequent immunology assessments,  $\alpha$ CD3/ $\alpha$ CD28  
840 beads were used with OPHION samples. Cultures were incubated at 37°C for 24 hours. After 24  
841 hours, cells were prepared for nucleic acid extractions.

842

#### 843 **Activation Induced Marker (AIM) assay**

844 AIM assays were performed as previously described<sup>43</sup>. Briefly, cryopreserved PBMC were  
845 thawed, washed, resuspended in R10, and rested for 3 hours at 37°C. Following the 3-hour rest  
846 interval, the appropriate number of cells were transferred to a 48-well plate and subsequently  
847 treated with CD40 blocking antibody (Miltenyi Biotec, cat. no. 130-094-133) for a final  
848 concentration of 0.5ug/mL for 15 minutes at 37°C. Cells were incubated in the presence or  
849 absence of our 10-LRA panel, as previously described. After an 18hr incubation, cells were  
850 harvested and stained for 50 minutes at 4°C with the surface staining monoclonal antibodies

851 (mAb); (PD-L1-PE/Cy7 (Biolegend, cat. no. 329717), CD40L-PE (BD Biosciences [BD], cat.  
852 no. 561720), OX40-APC (BD cat. no. 563473), CD69-BV650 (Biolegend cat. no. 310933),  
853 CD3-BV605 (Biolegend cat. no. 317322), CD4-BV421 (BD cat. no. 562424), CD8-PerCp-Cy5.5  
854 (BD cat. no. 560662), CD25- BUV395 (BD cat. no. 564034) and LIVE/DEAD Near-IR stain  
855 (ThermoFisher cat. no. L34975), washed, fixed and permeabilized (BD cytofix fixation buffer,  
856 cat. no. 554655), and then stained for 30 minutes at 4°C with intracellular mAb Acetyl-histone  
857 H3-Alexa Fluor 488 (Cell Signaling Technology, cat. no. 9683S) in 1x perm/wash buffer (BD,  
858 cat. no. 554723). The cells were washed and fixed (BD cytofix fixation buffer, cat. no. 554655)  
859 prior to flow cytometry analysis.

860

#### 861 **Intracellular cytokine staining**

862 Cryopreserved PBMC were thawed, washed, resuspended in RPMI + 10% FBS (R10), and  
863 rested for 3 hours at 37°C. Following the 3-hour rest interval, the appropriate number of cells  
864 were transferred to a 48-well plate and incubated for 2 hrs with our panel of 10 LRA. Following  
865 this 2-hour incubation period, GolgiPlug (BD, cat. no. 555029) and GolgiStop (BD, cat. no.  
866 554724) were added to each condition at a concentration of 1:1000 and 6:10000 respectively,  
867 then incubated at 37°C for an additional 16 hrs. Cells were harvested, pelleted, resuspended,  
868 stained for 20 minutes at 4°C with surface staining mAb (CD3-BV605, CD4-BV421, CD8-  
869 PerCp-Cy5.5 and LIVE/DEAD Near-IR stain), fixed and permeabilized as described above, and  
870 then stained for 30 minutes at 4°C with the intracellular mAb TNF- $\alpha$ - PE/Dazzle-594 (Biolegend  
871 cat. no. 502946), IL-2- PE/Cy7 (BD cat. no. 560707) and IFN- $\gamma$ - BV510 (Biolegend cat. no.  
872 502544). PBMC were washed and fixed in (BD cytofix fixation buffer, cat. no. 554655) prior to  
873 flow cytometry analysis, as described above.

874

875 **Flow cytometry**

876 Cells were acquired on a BD LSRFortessa using FACSDiva. Analysis was performed using  
877 FlowJo software versions 10.6.2 (Treestar, Versions 10 for Mac). Representative gating  
878 strategies can be found in the supplemental figures.

879

880 **Statistical analysis**

881 Statistical analyses were performed using GraphPad Prism 9 for macOS. Means, medians, 95%  
882 confidence intervals, and standard errors of the mean were calculated. The pre-specified primary  
883 outcome of OPHION was a comparison of  $\log_{10}$  PBMC HIV-1 caRNA levels between  
884 participants who use and do not use opioids. The pre-specified outcome for OPHION latency  
885 reversal experiments was the difference in HIV-1 caRNA levels between LRA treatment groups  
886 and across opioid use groups. To assess for changes in HIV-1 caRNA, we performed Kruskal-  
887 Wallis testing of all participants together for each of the LRAs with Dunn's multiple comparison  
888 test, comparing the mean rank of each LRA condition with the mean rank of every other LRA  
889 condition. An identical approach was taken with a series of exploratory analyses with OPHION  
890 participant samples that assessed histone acetylation, surface activation, and intracellular  
891 cytokine production, and with the exploratory statistical analyses performed on experiments with  
892 HEAL participant samples.



**a.**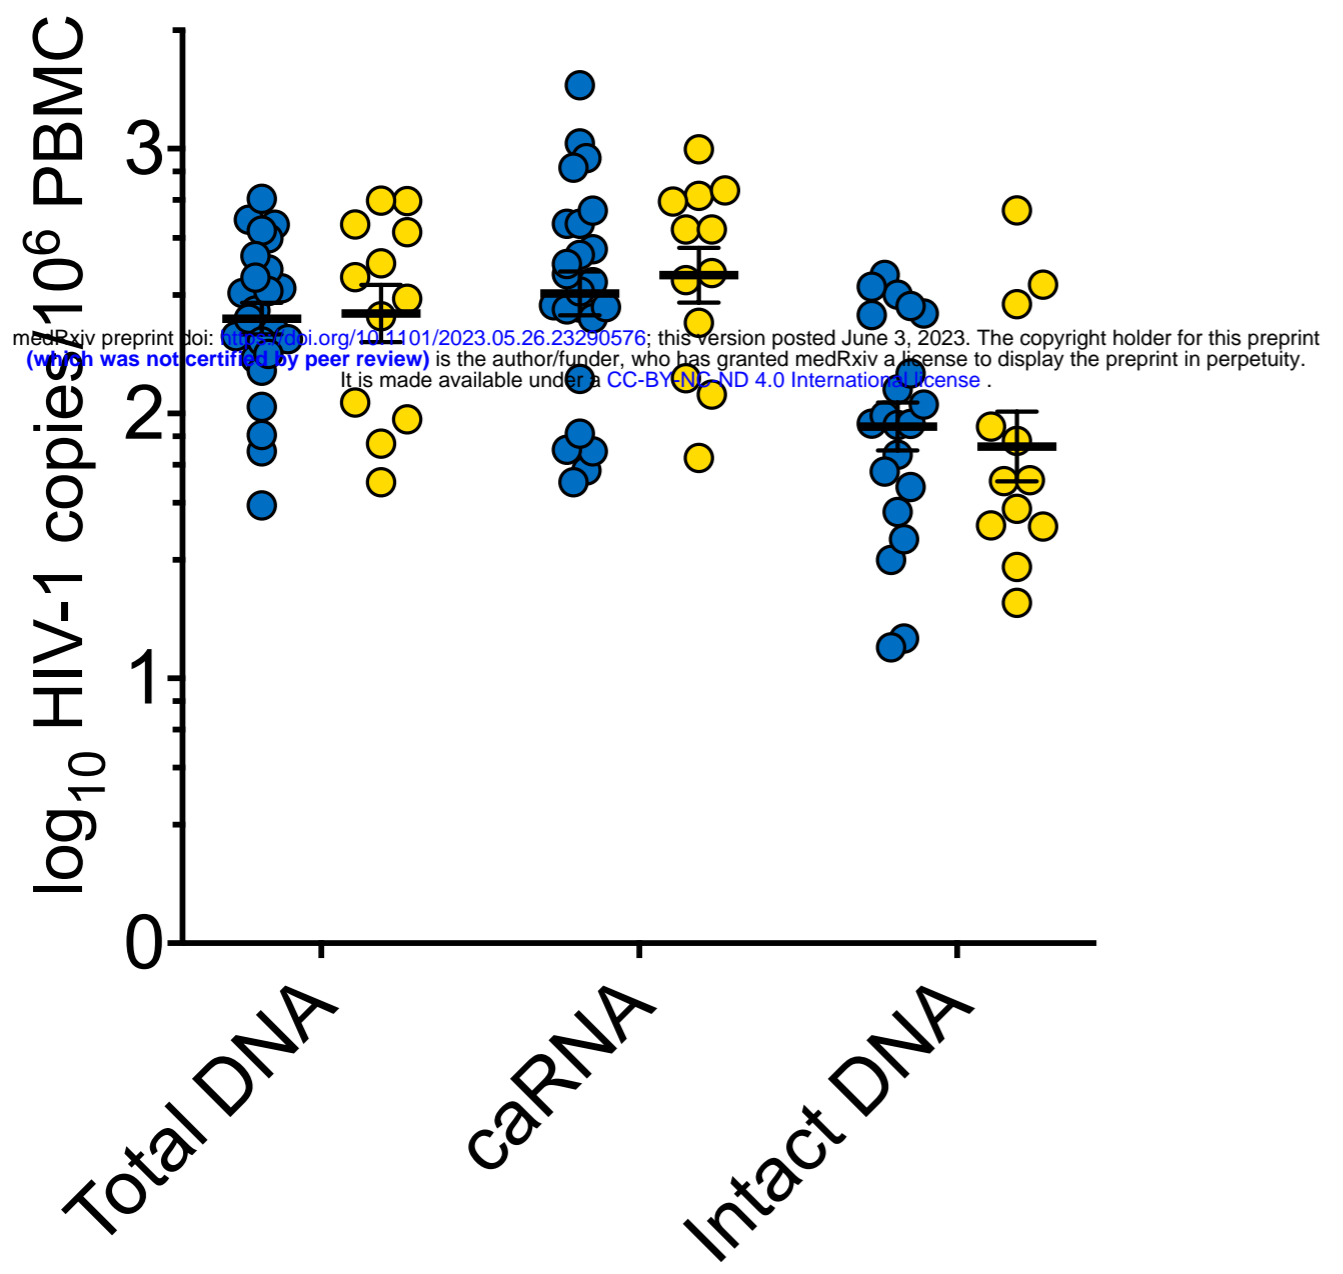**b.**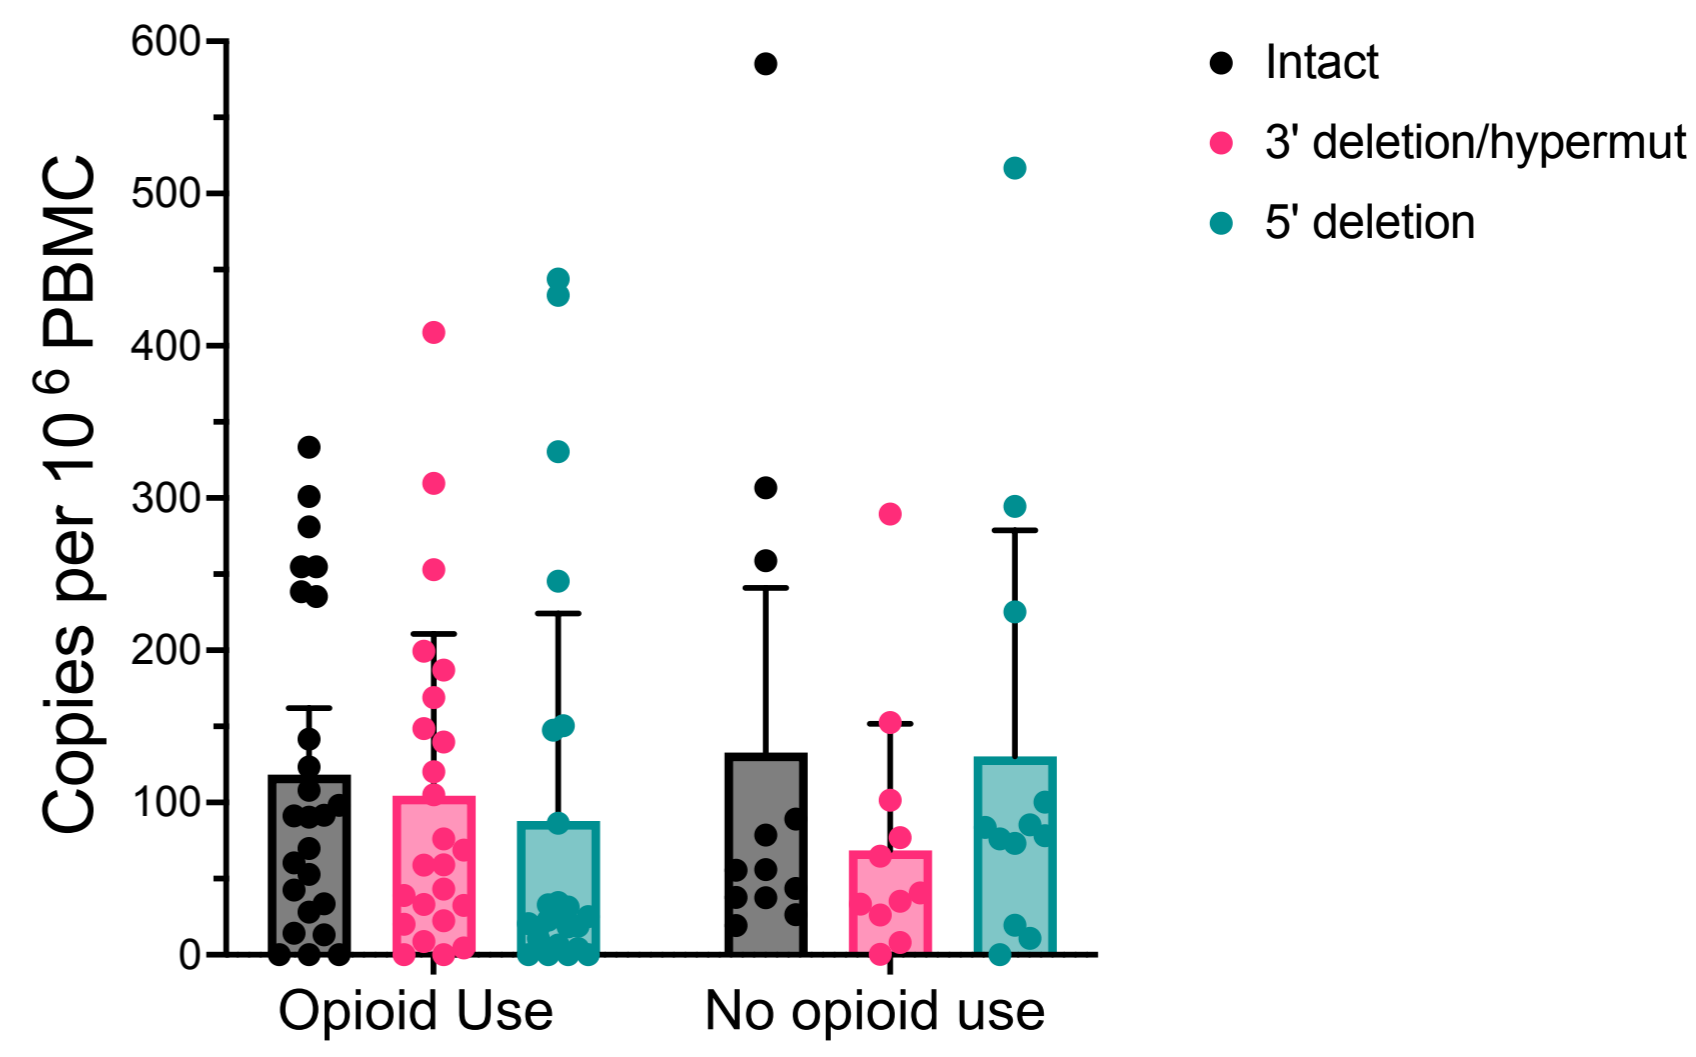**c.**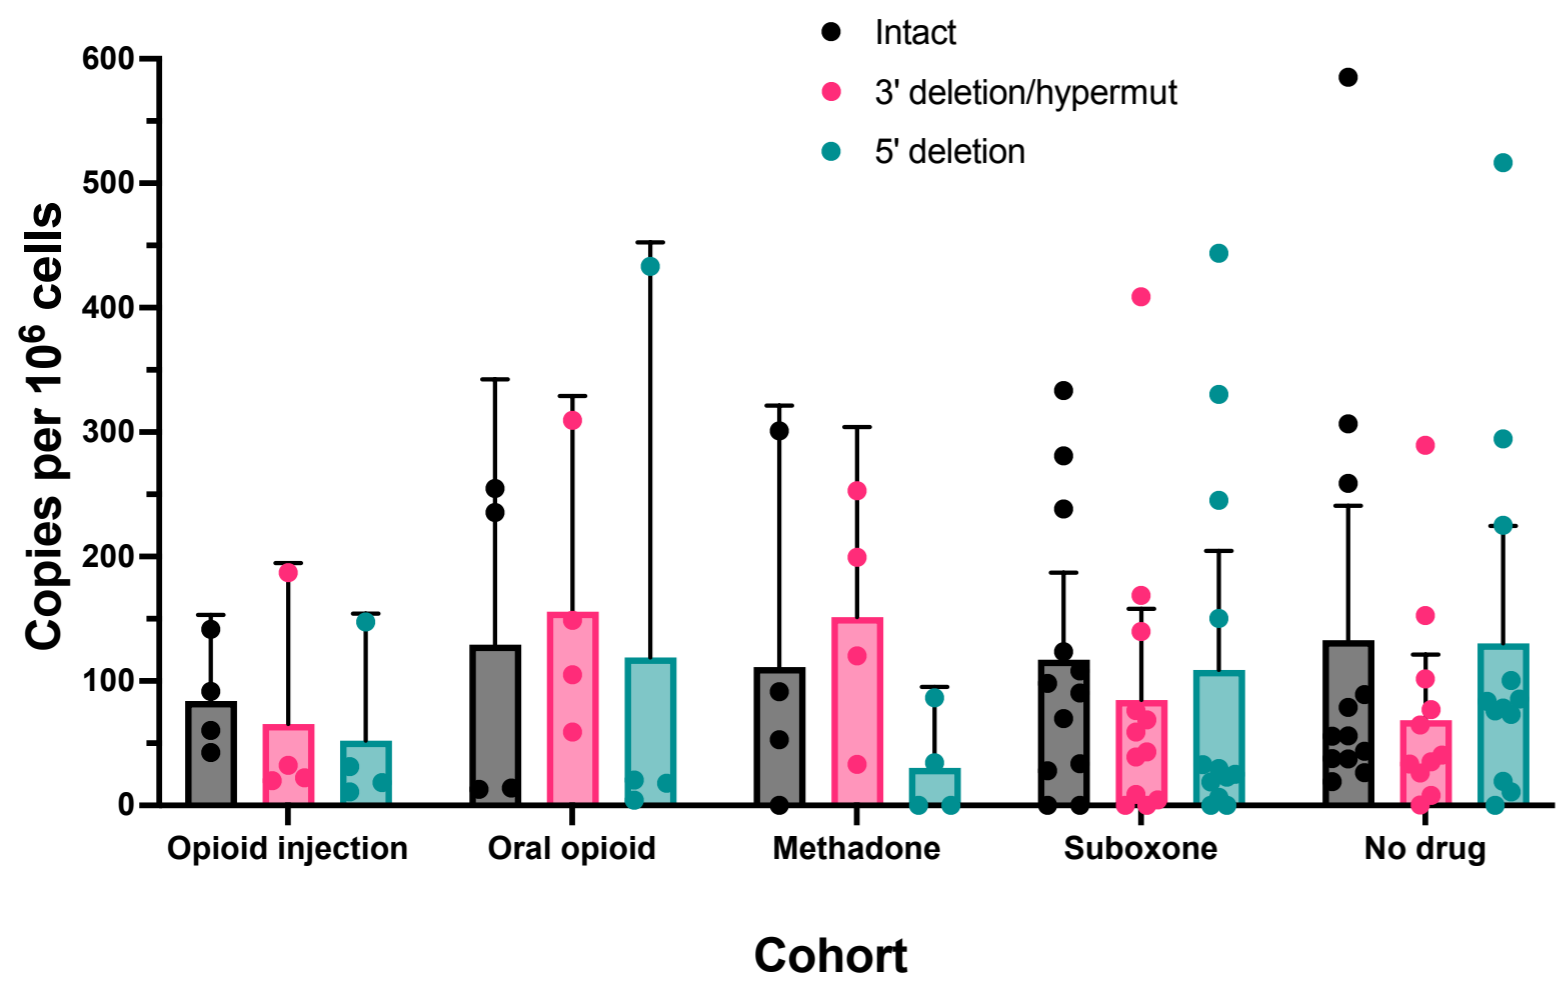**d.**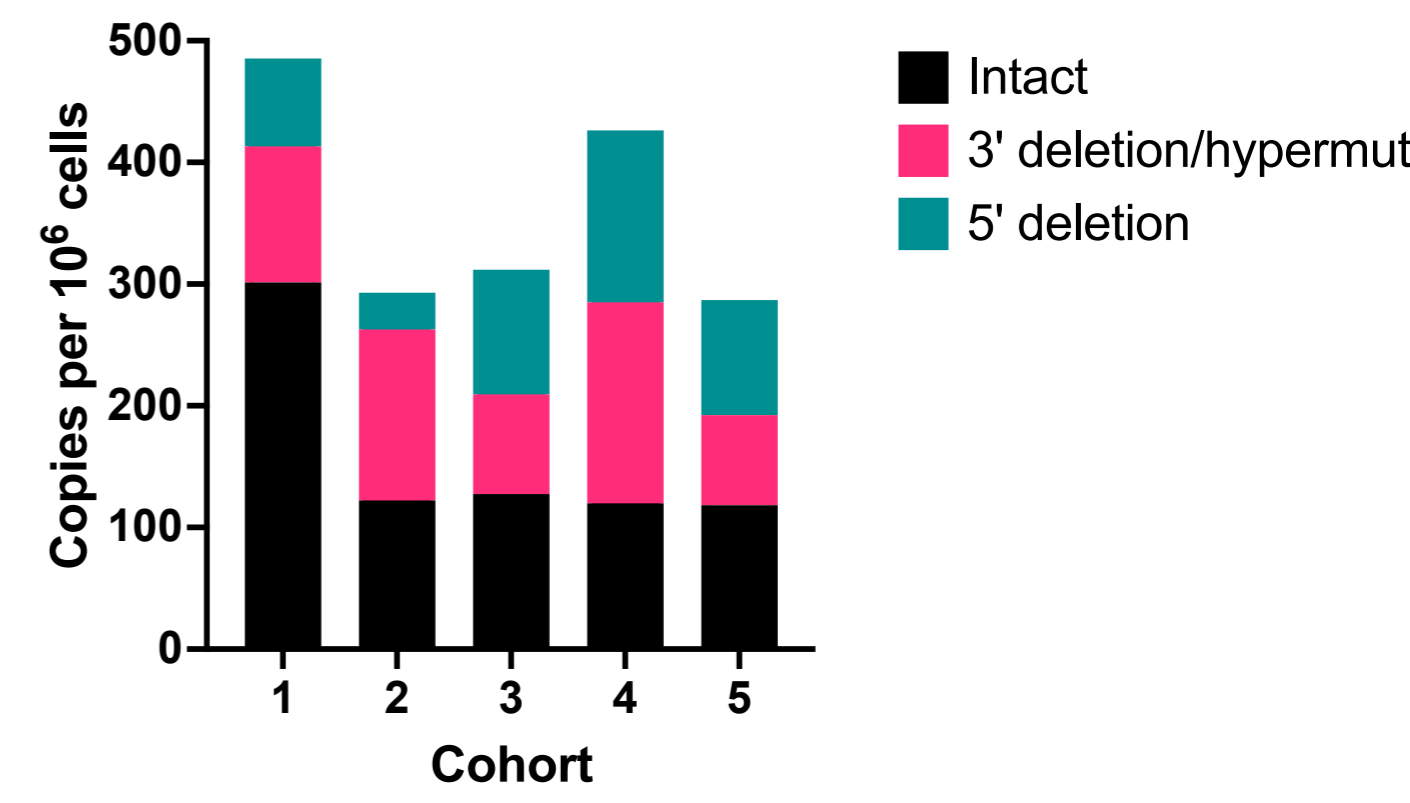

Figure 1

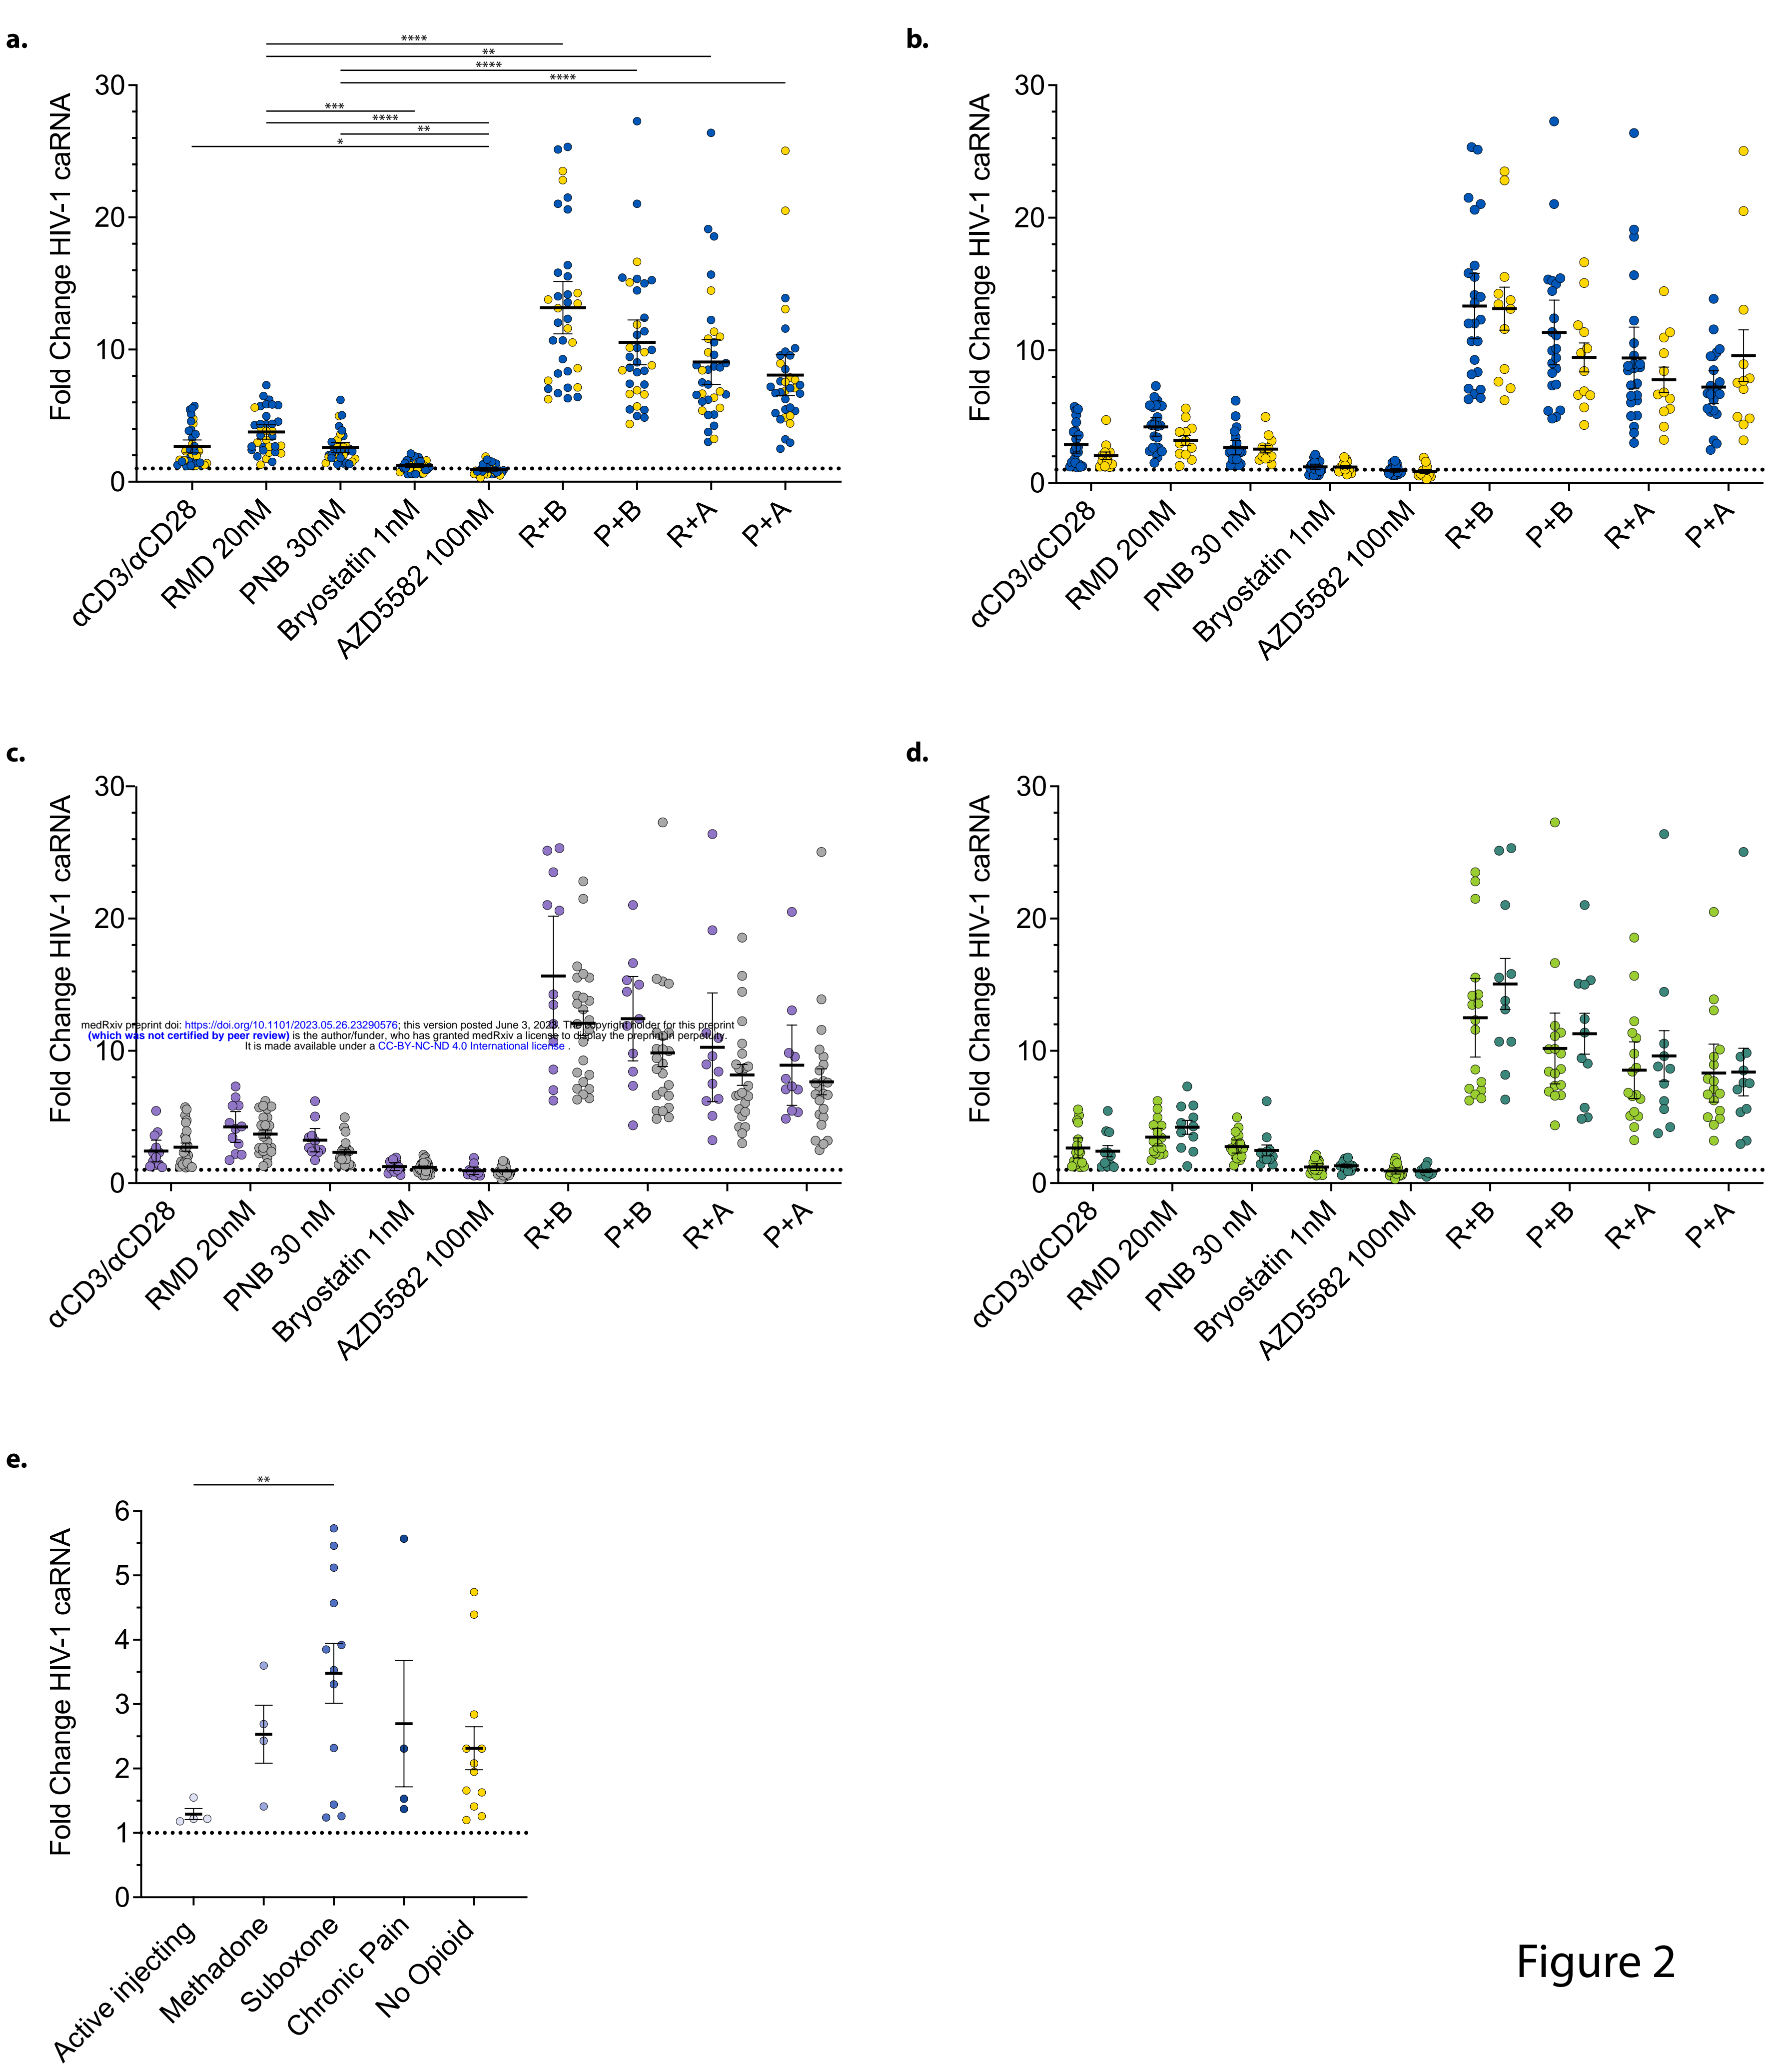

Figure 2

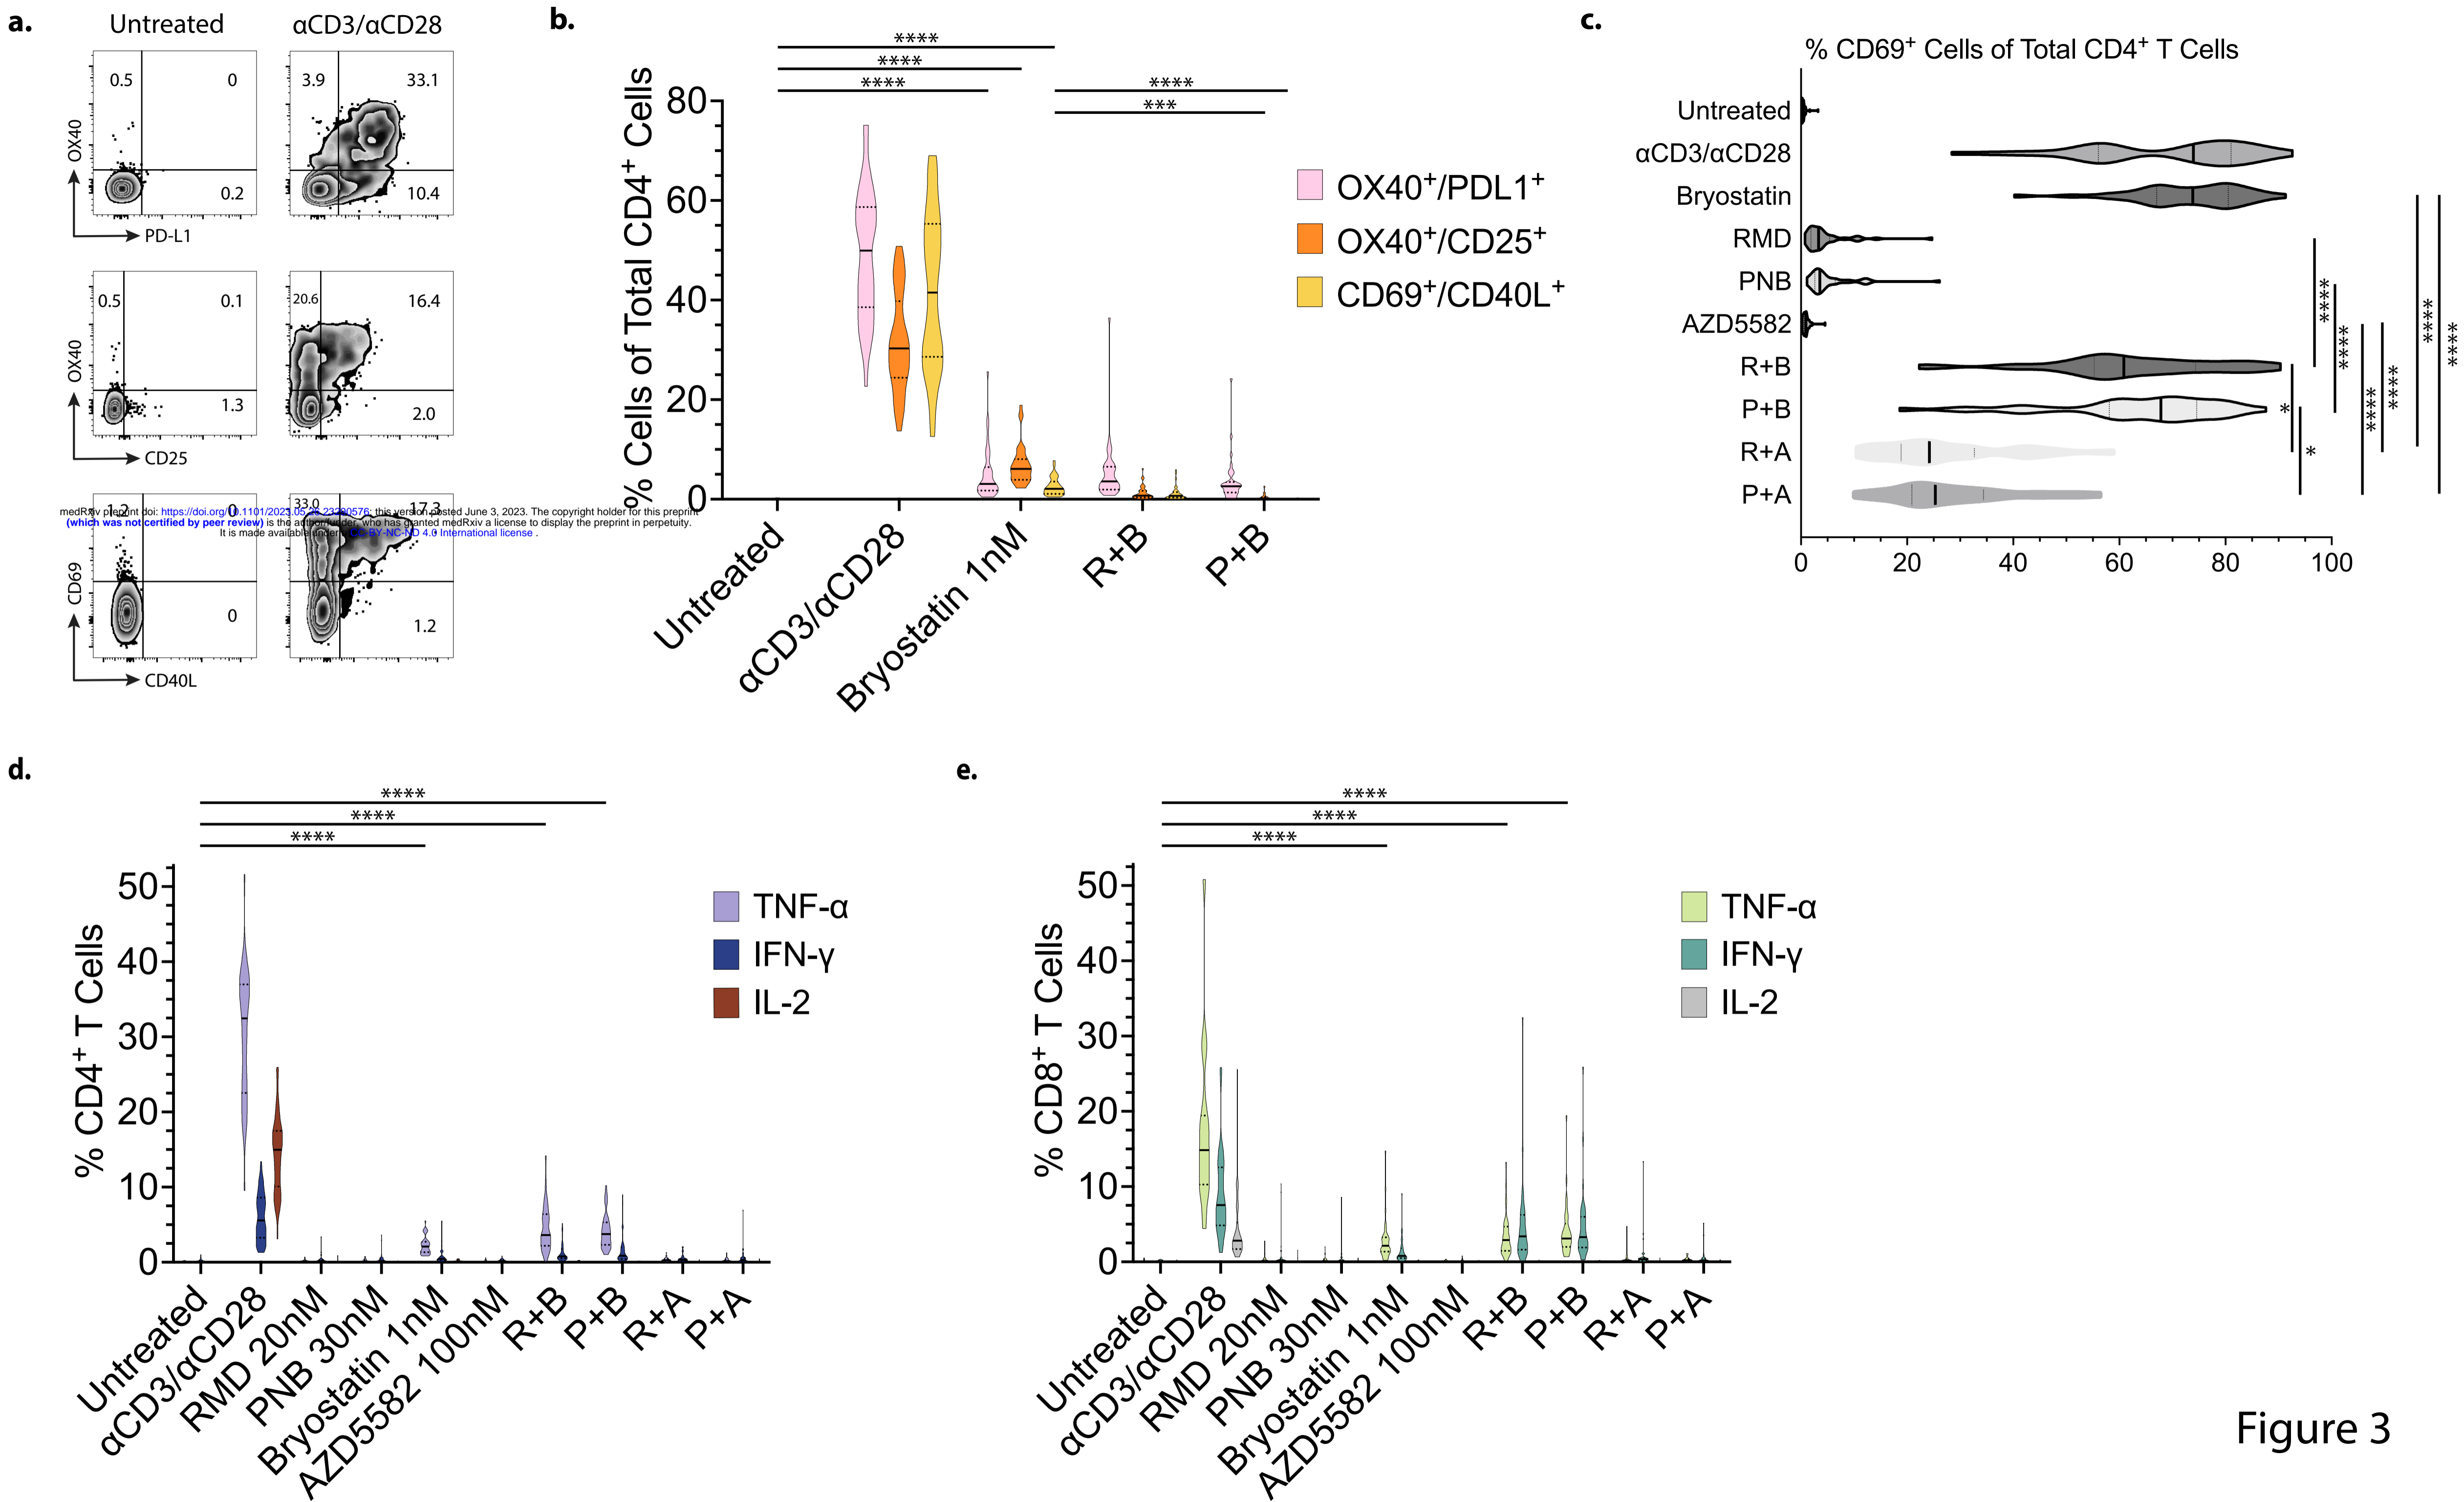

Figure 3

Figure 4

a.

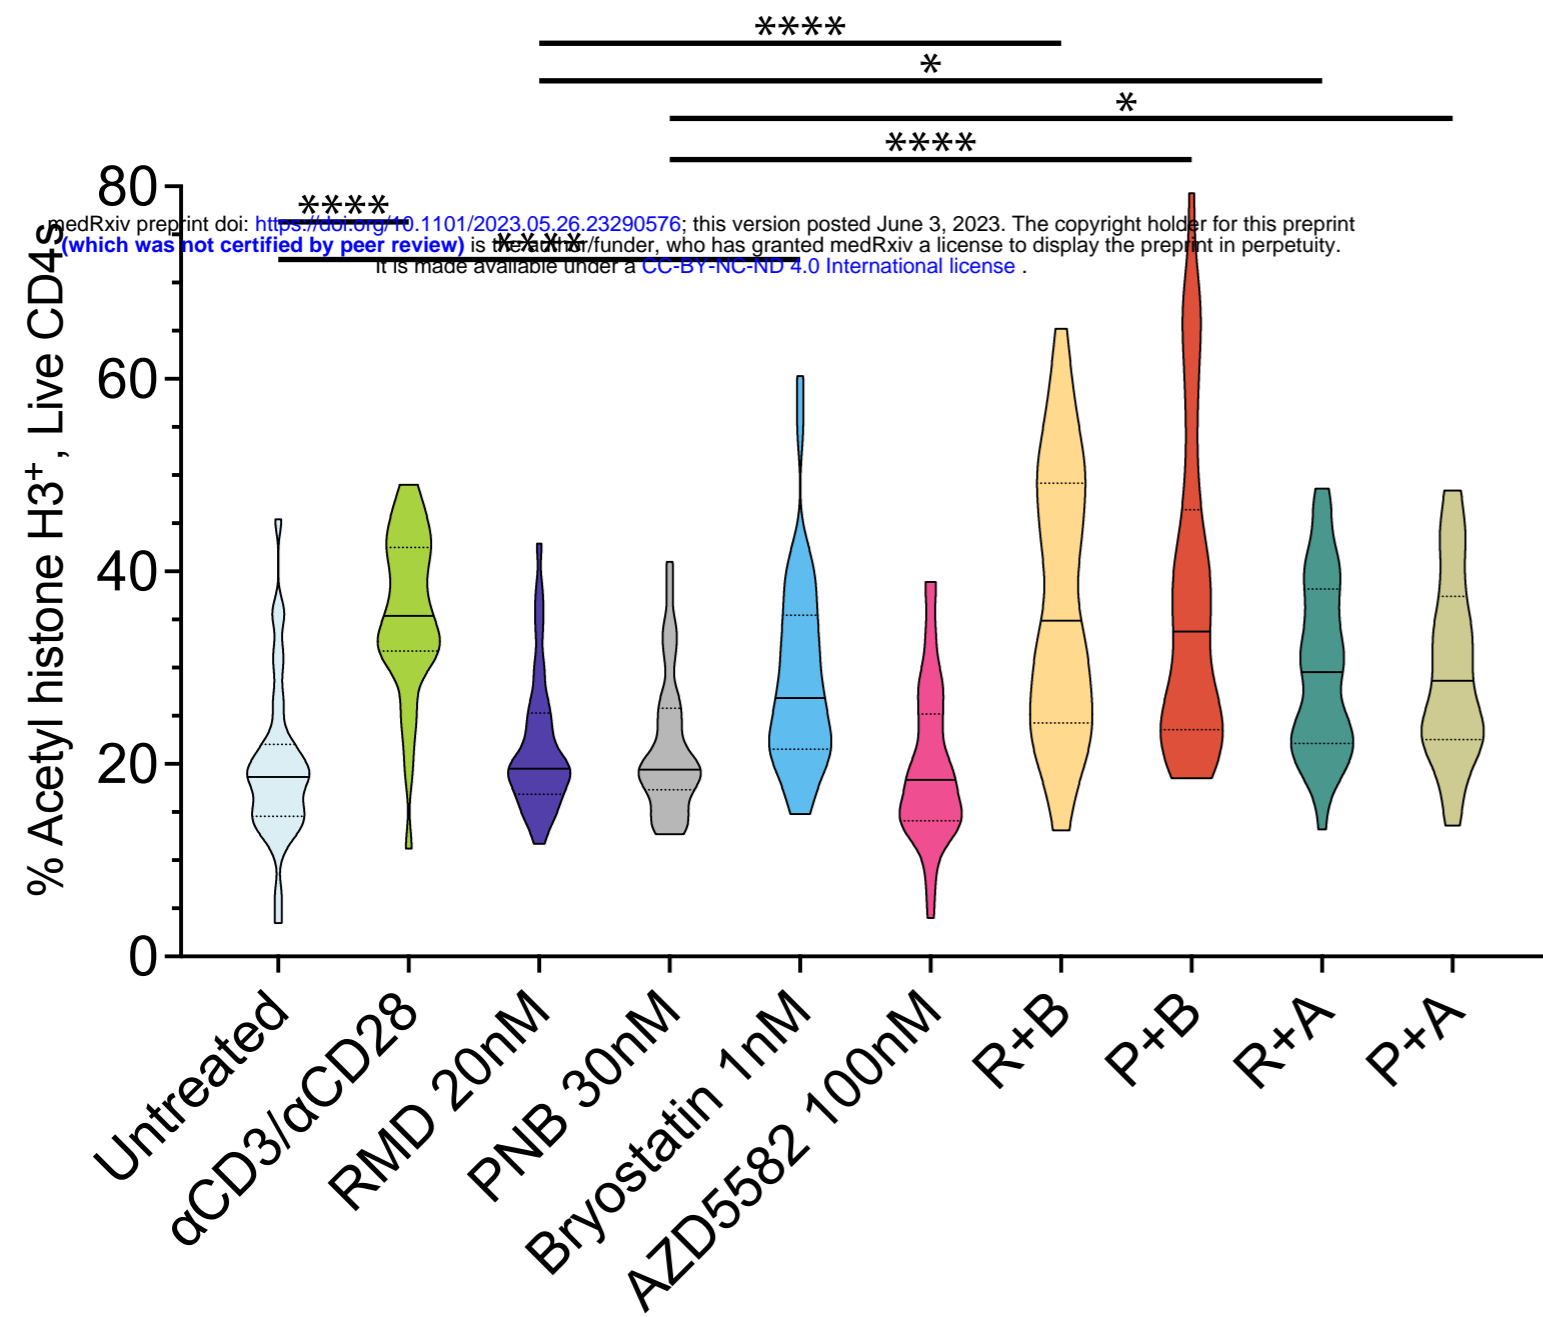

b.

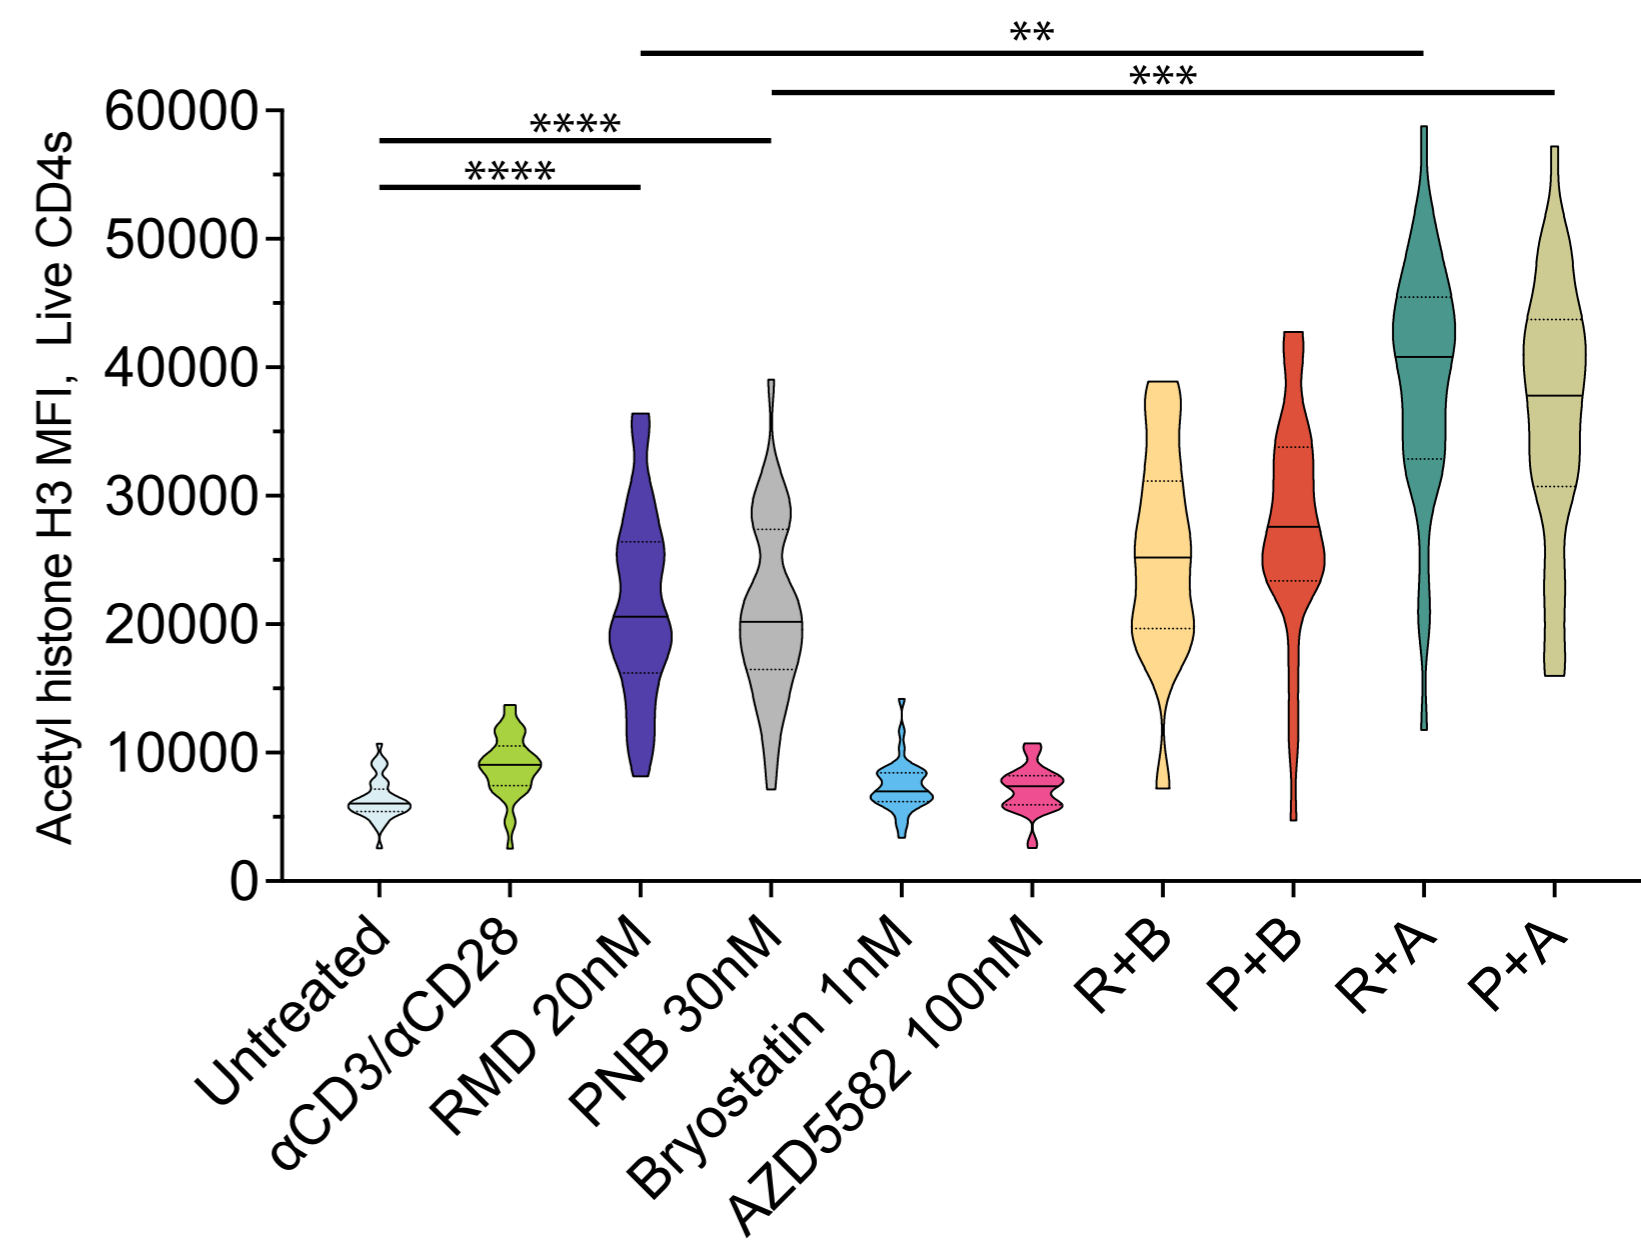

c.

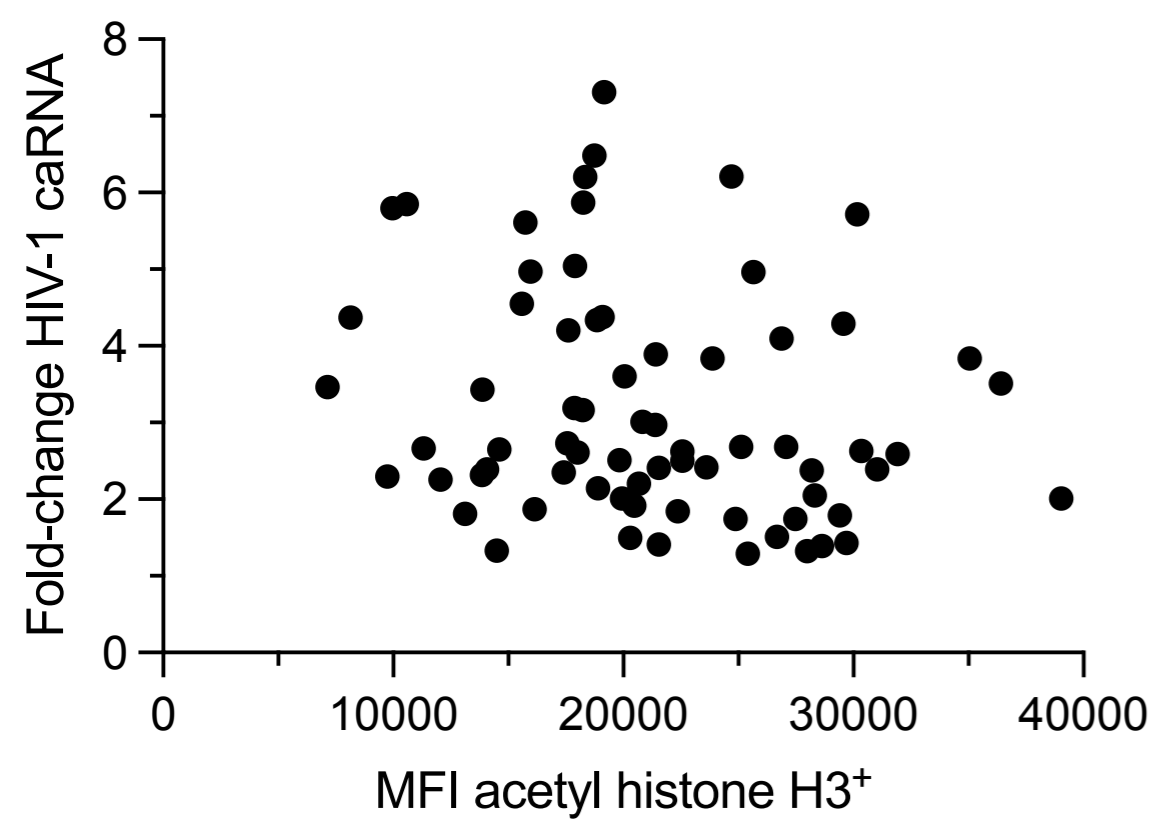

d.

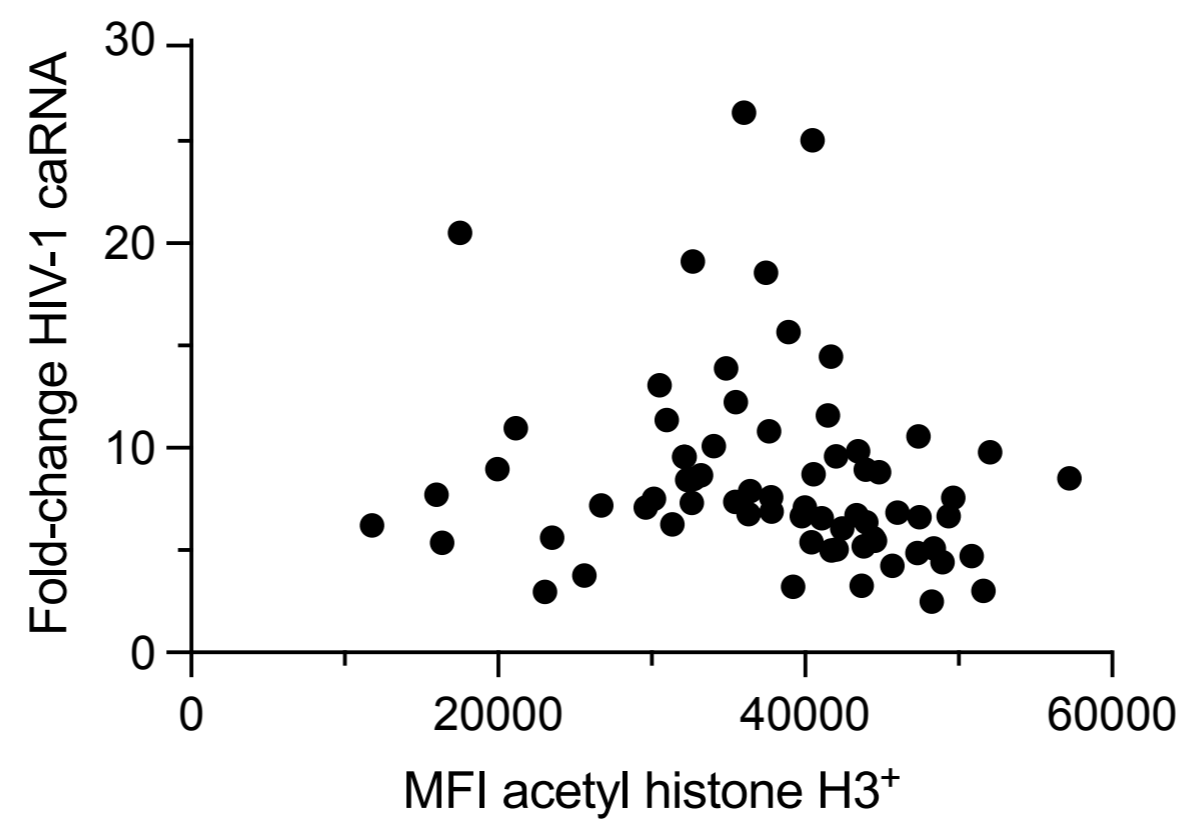

e.

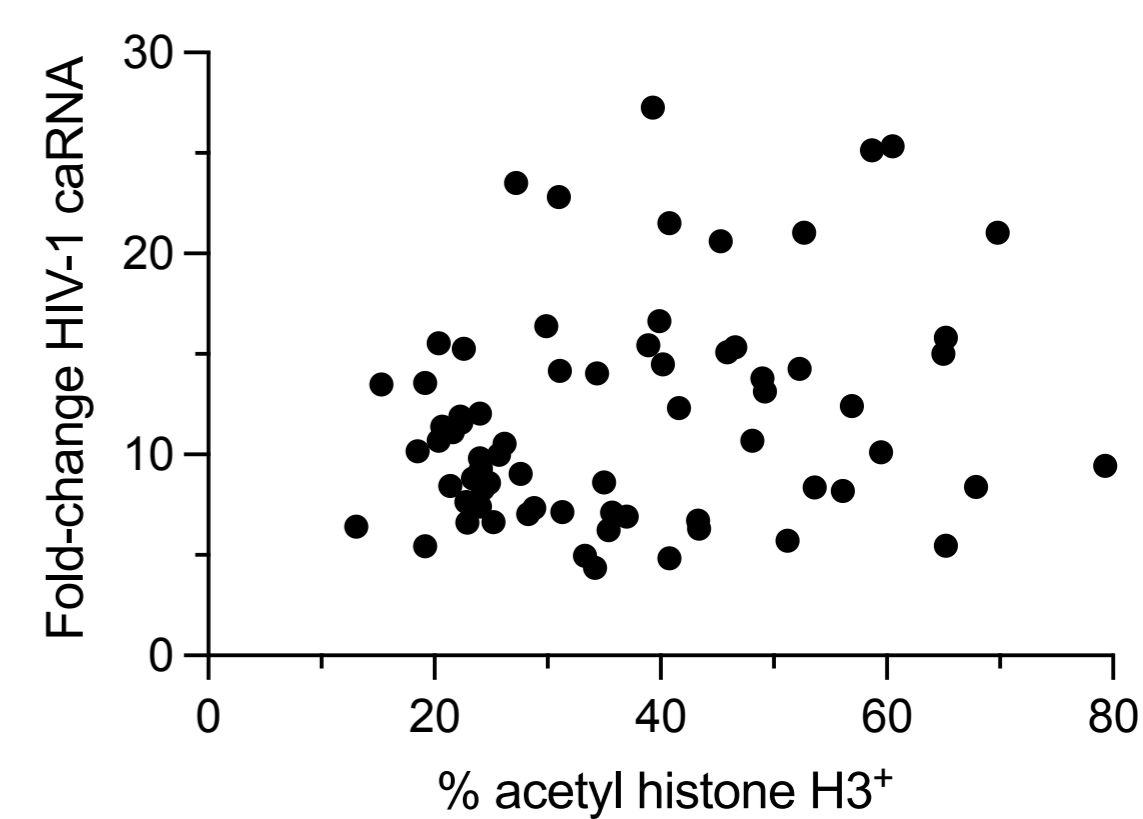

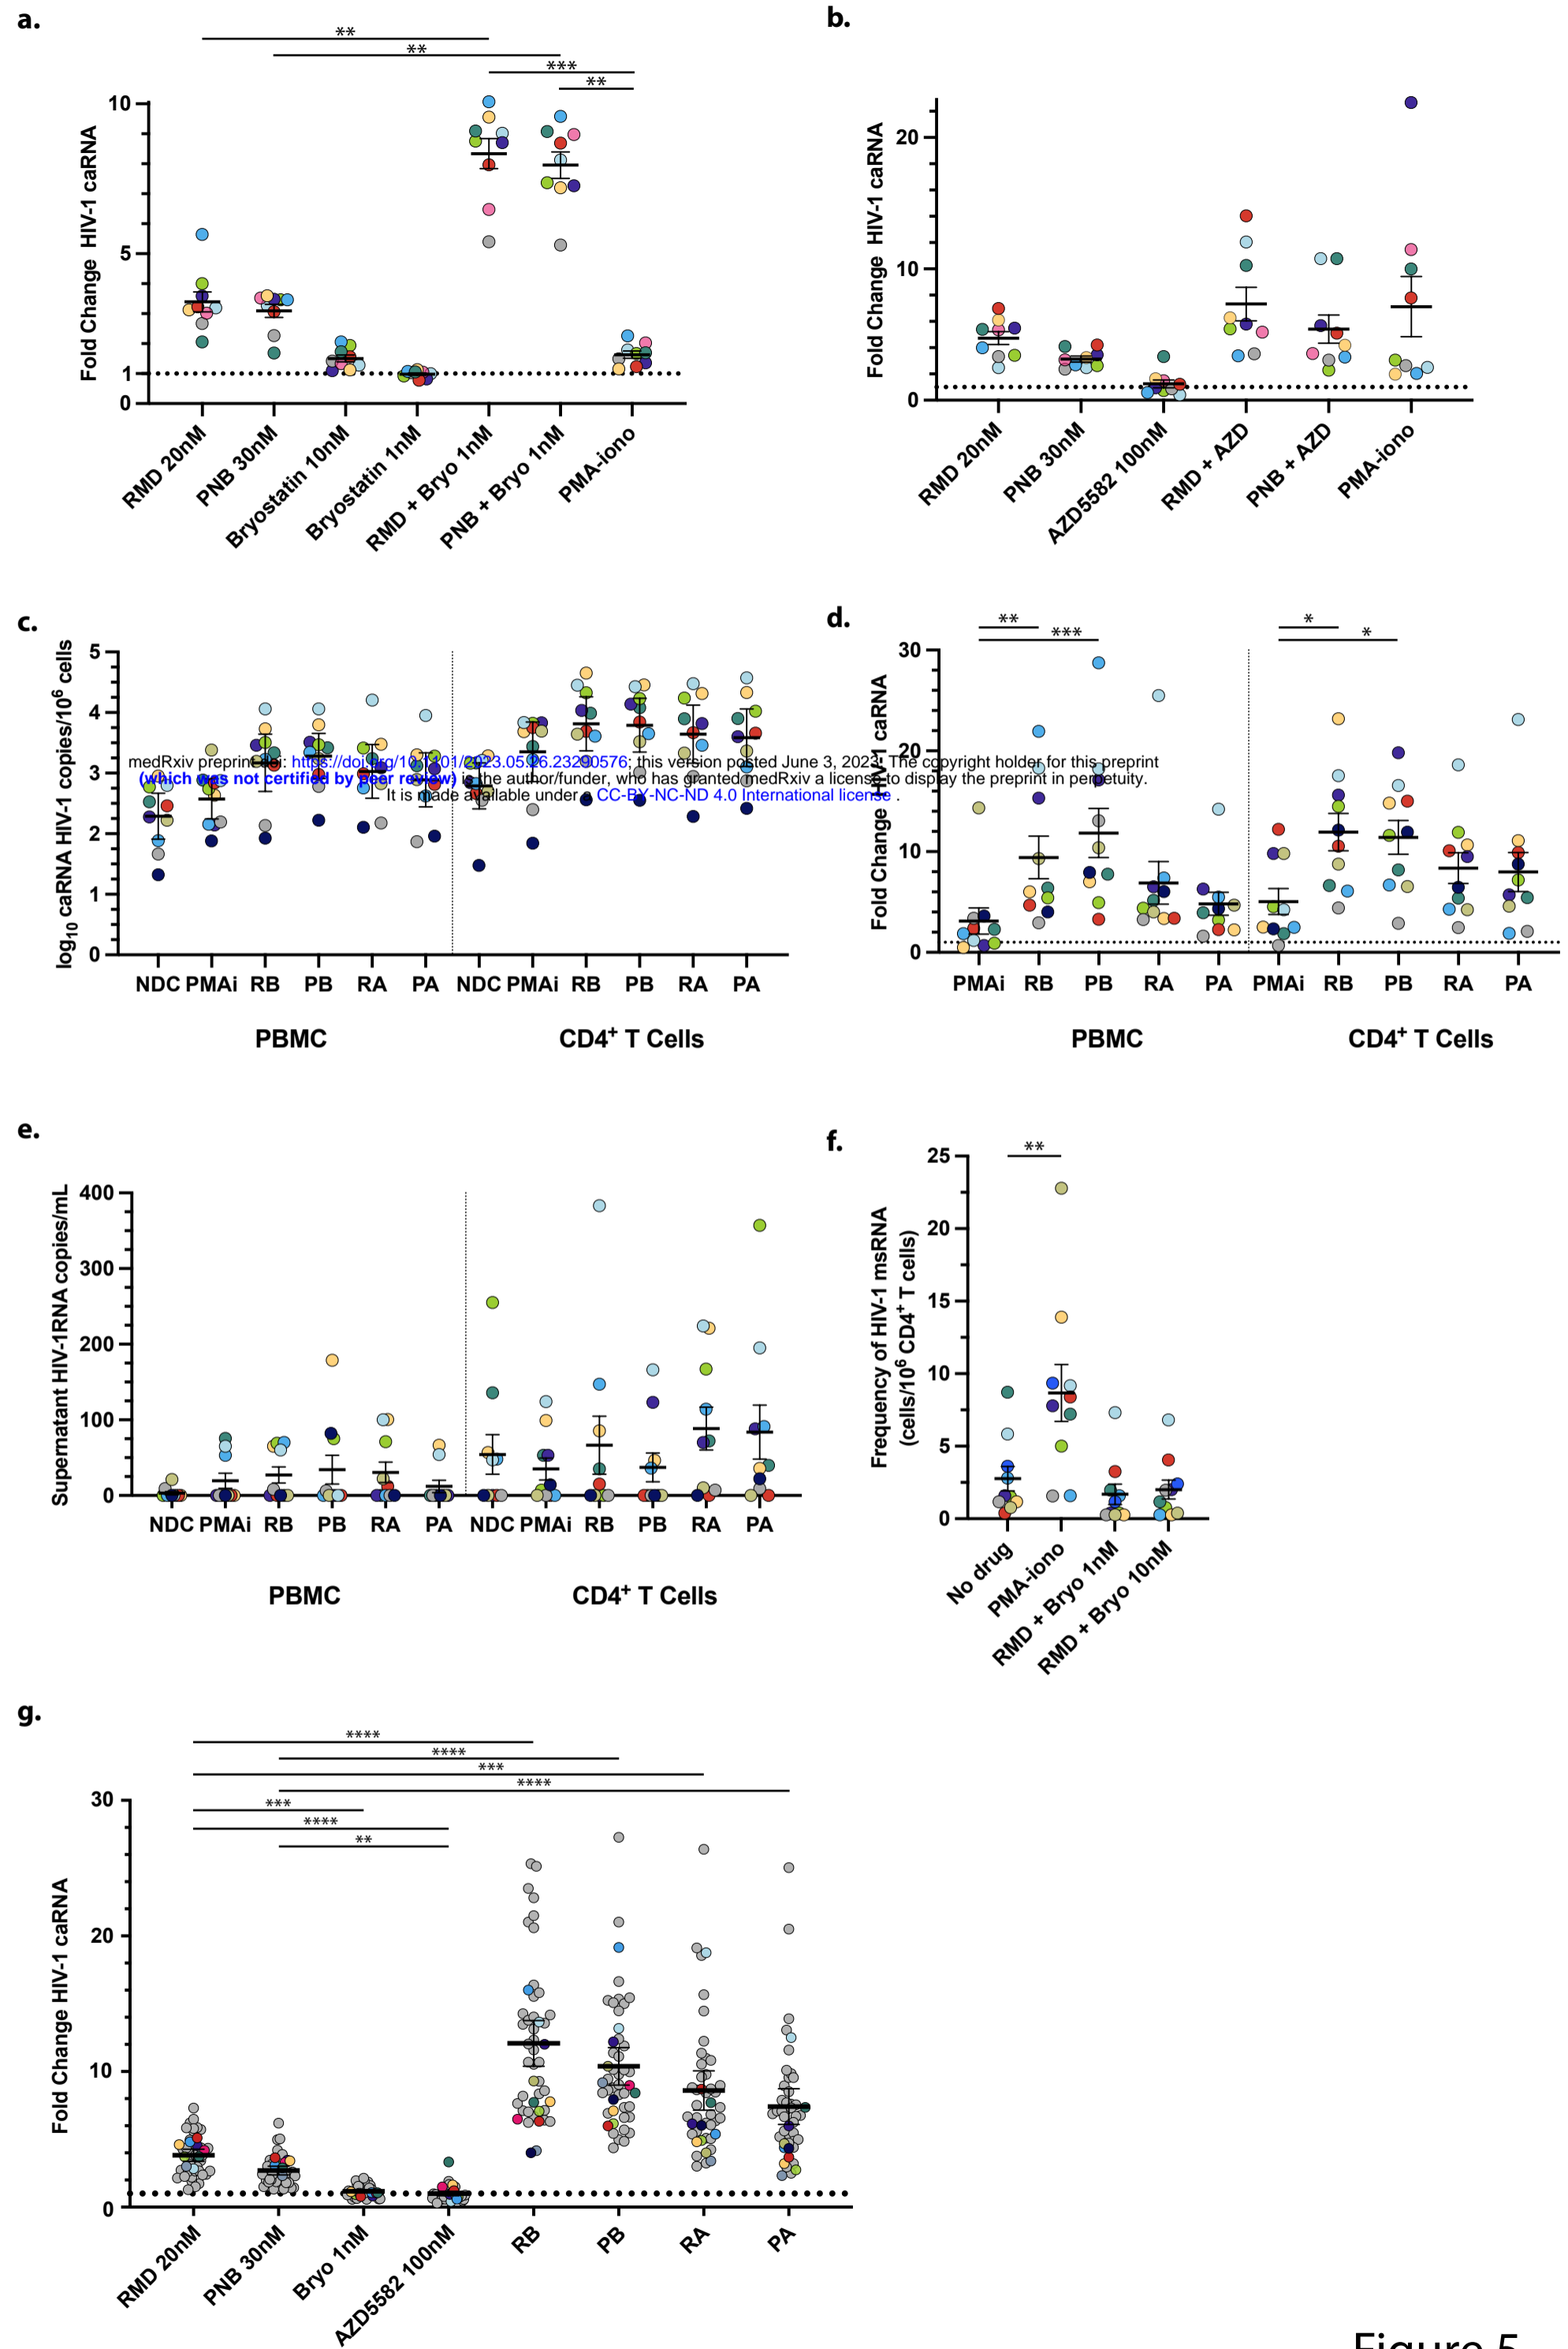

Figure 5
