# Supplementary material for: HIV-1 latency reversal agent boosting is not limited by opioid use
Source: bioRxiv or medRxiv preprint supplement (doi:10.1101/2023.05.26.23290576), 2024-06-04

Supplementary Figure 4

**a.**

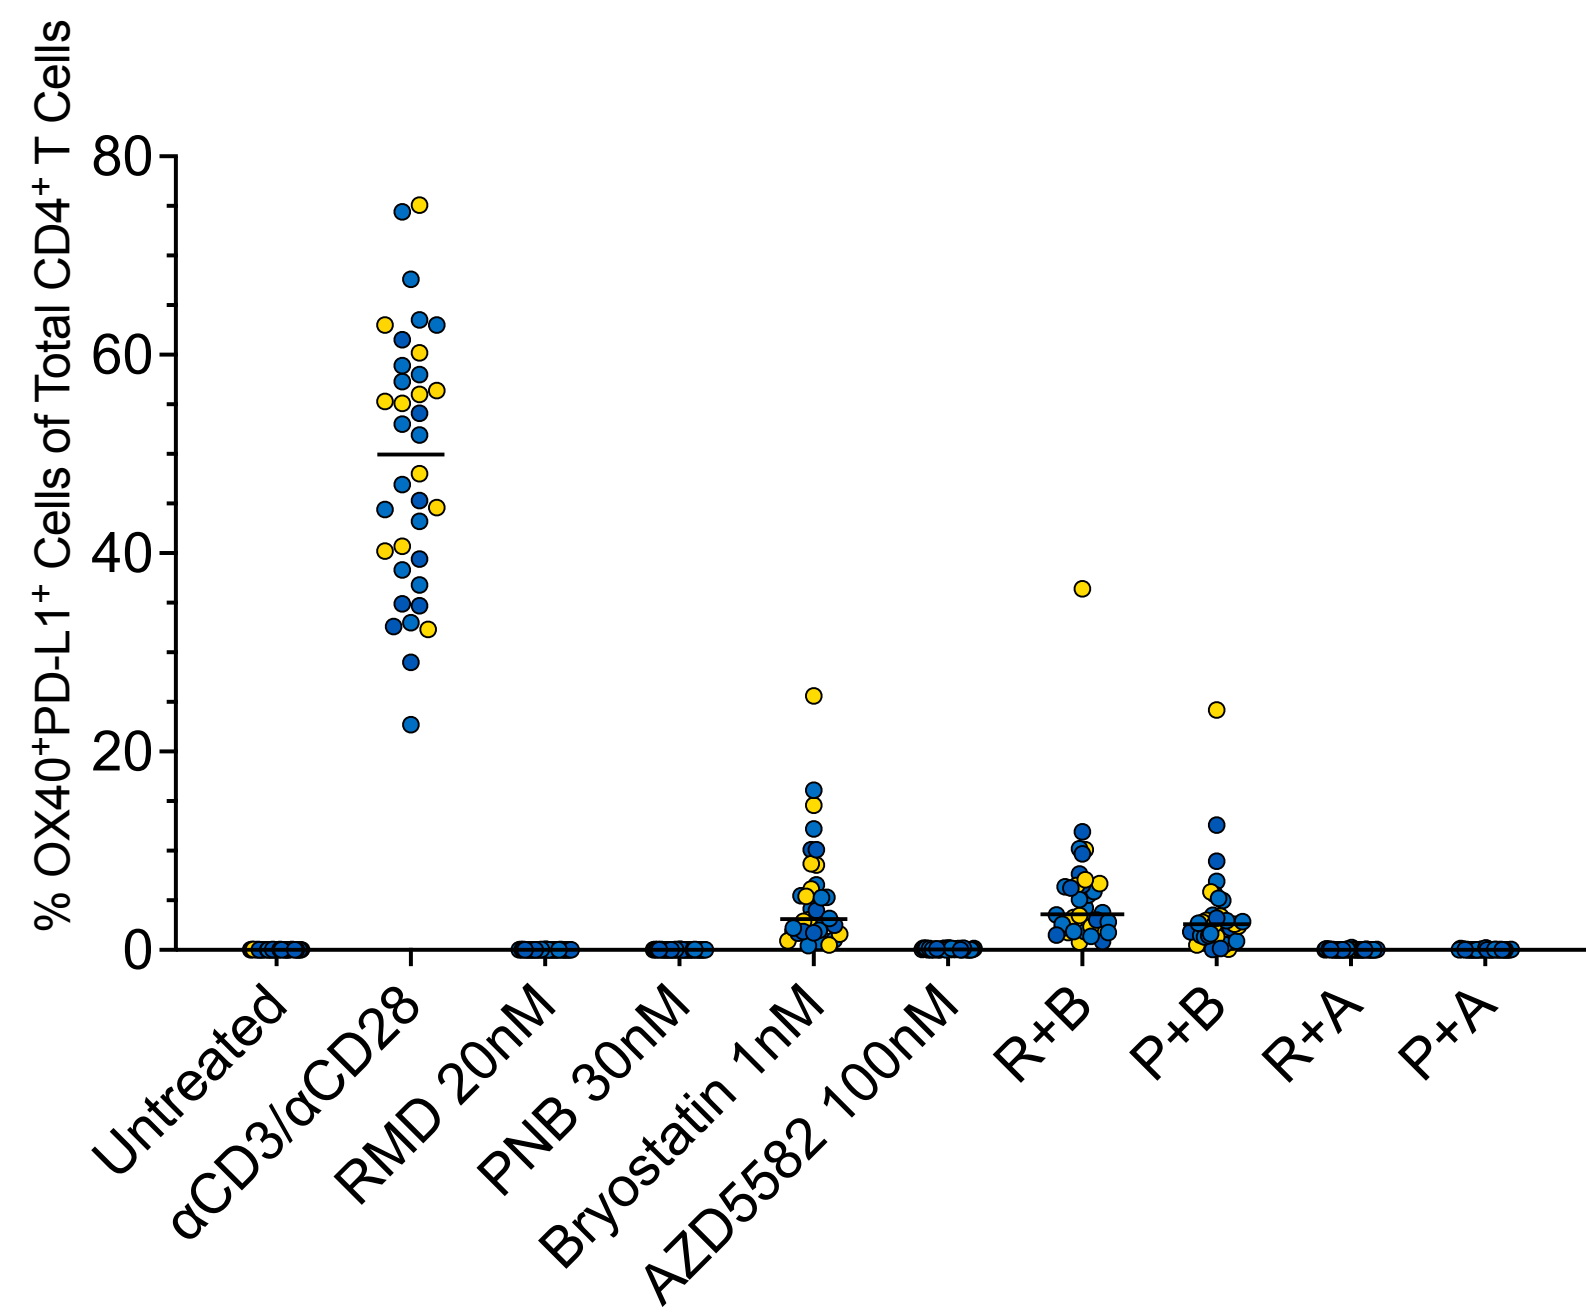

**b.**

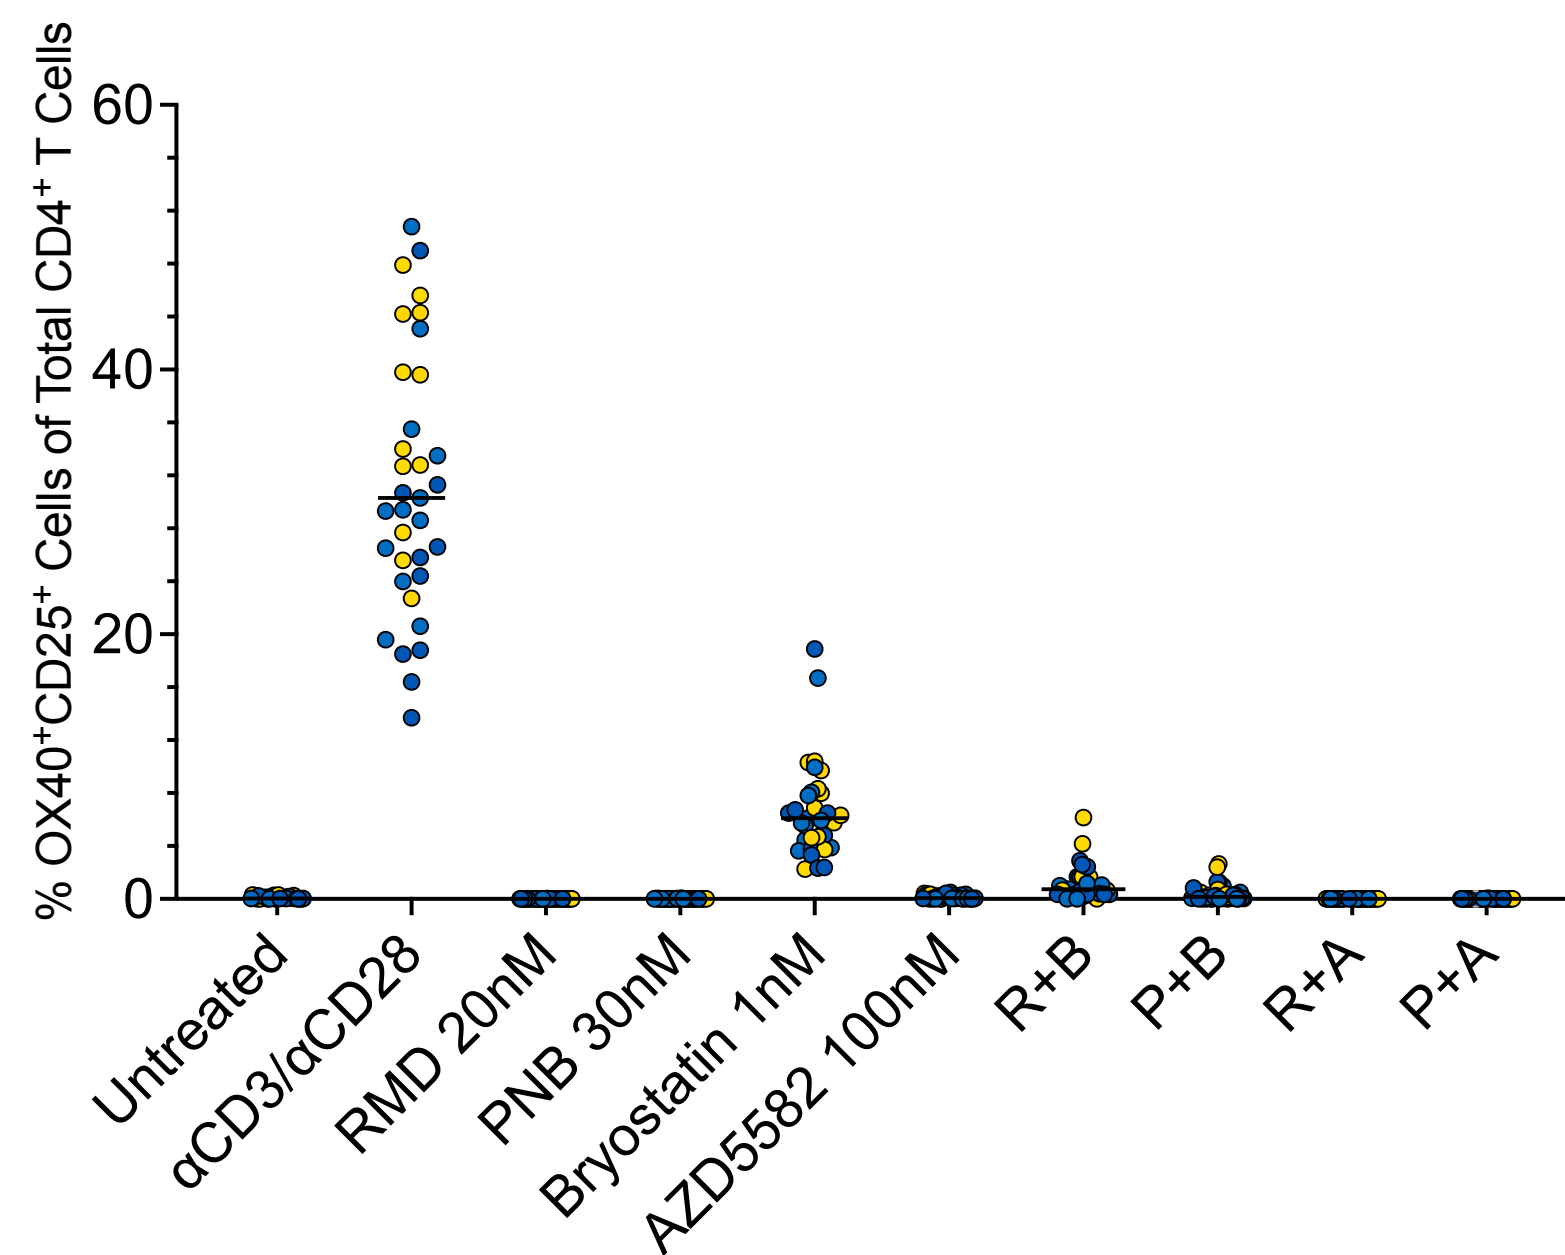

**c.**

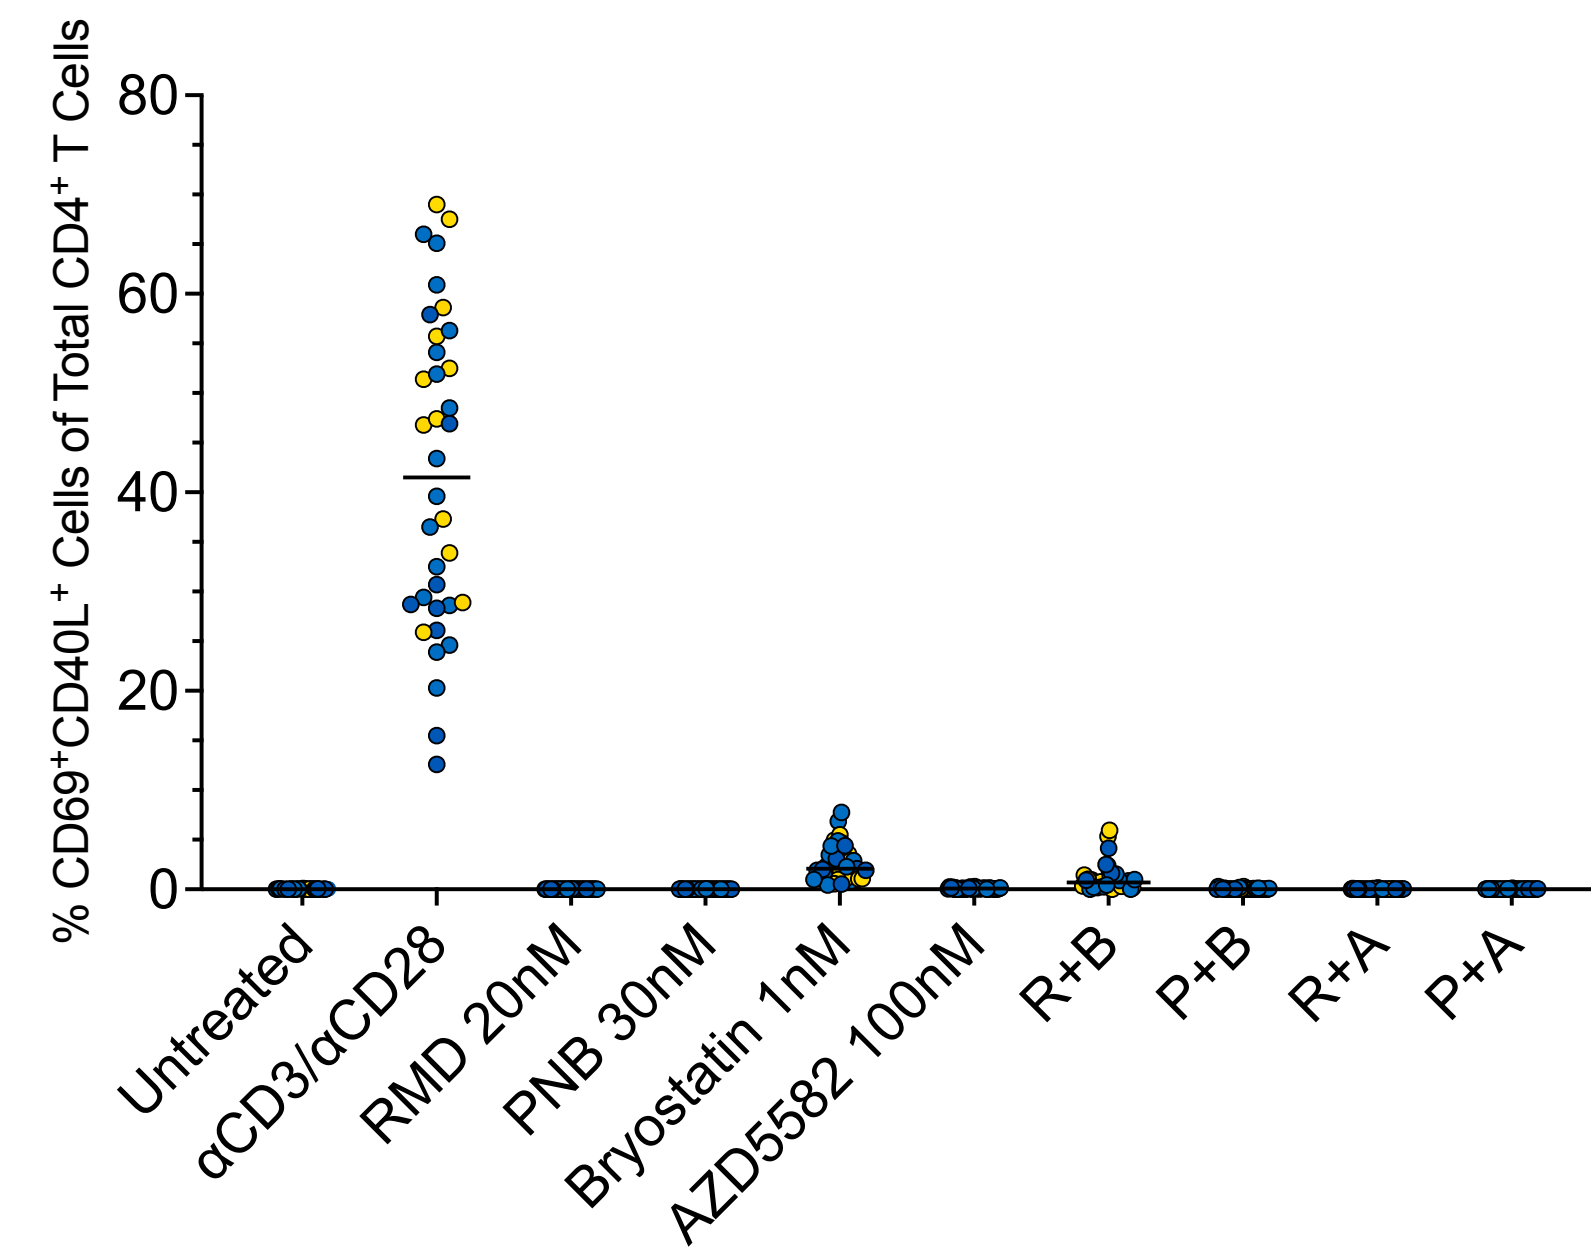

**d.**

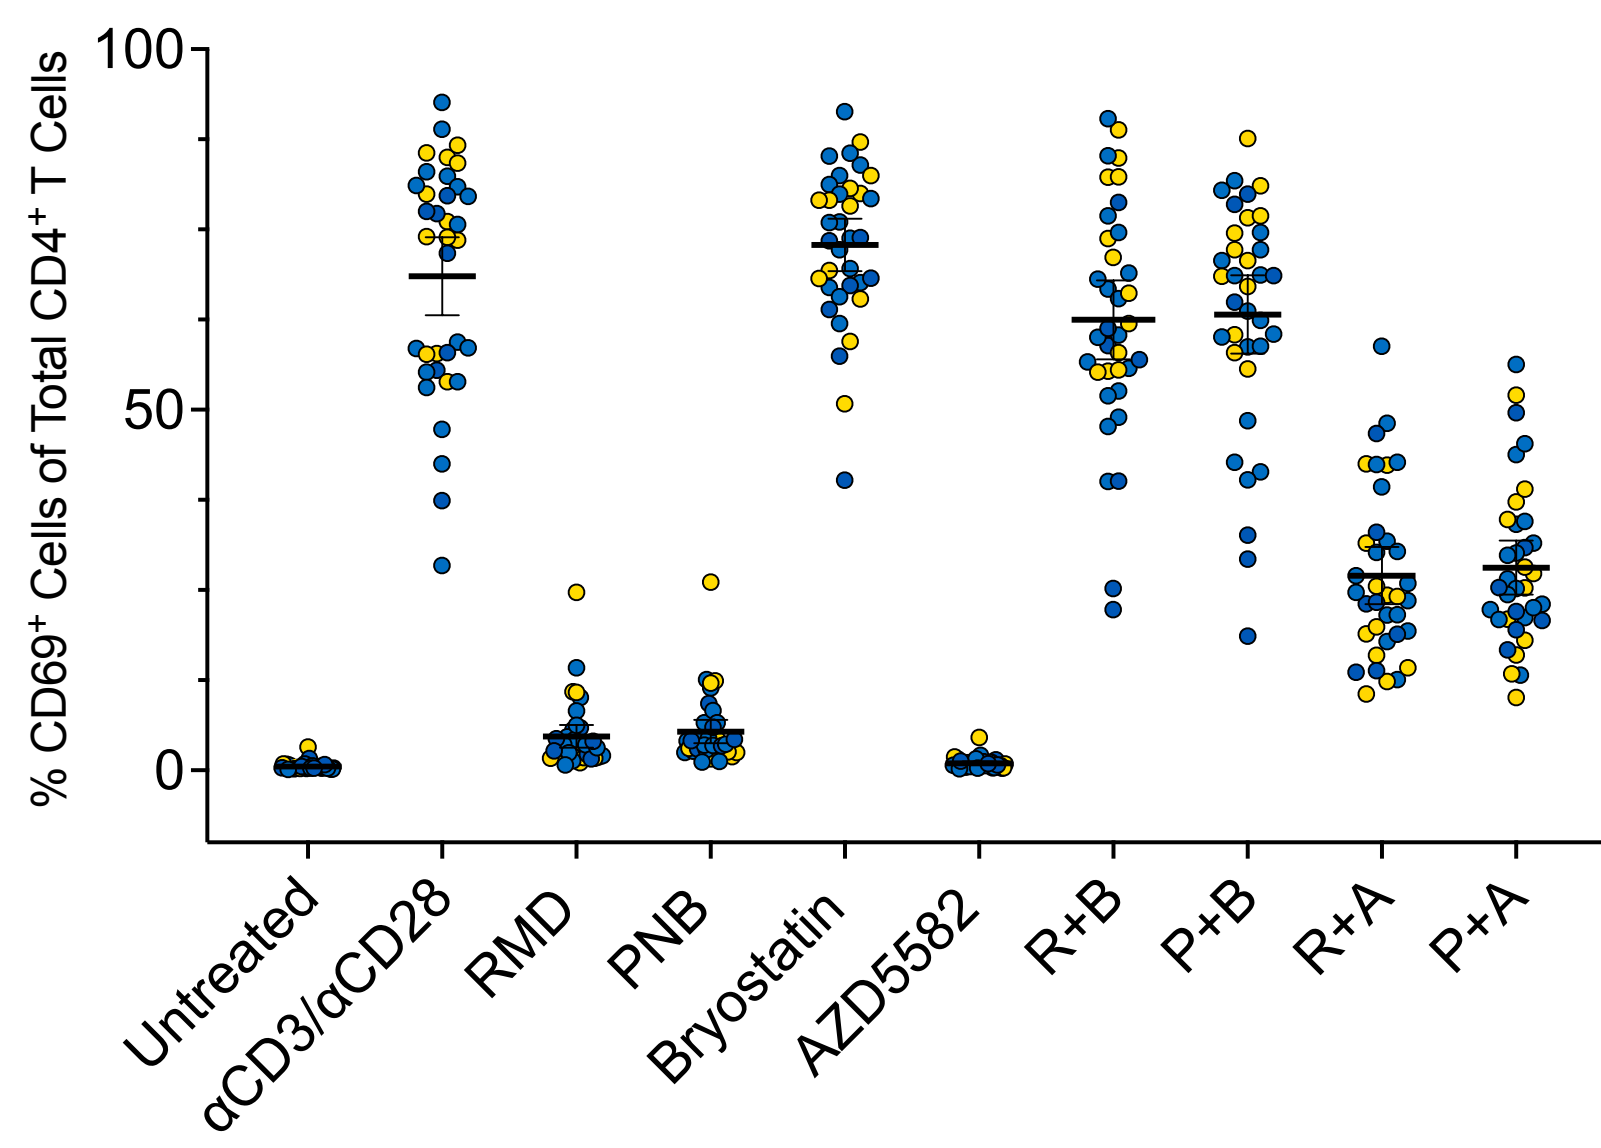

**e.**

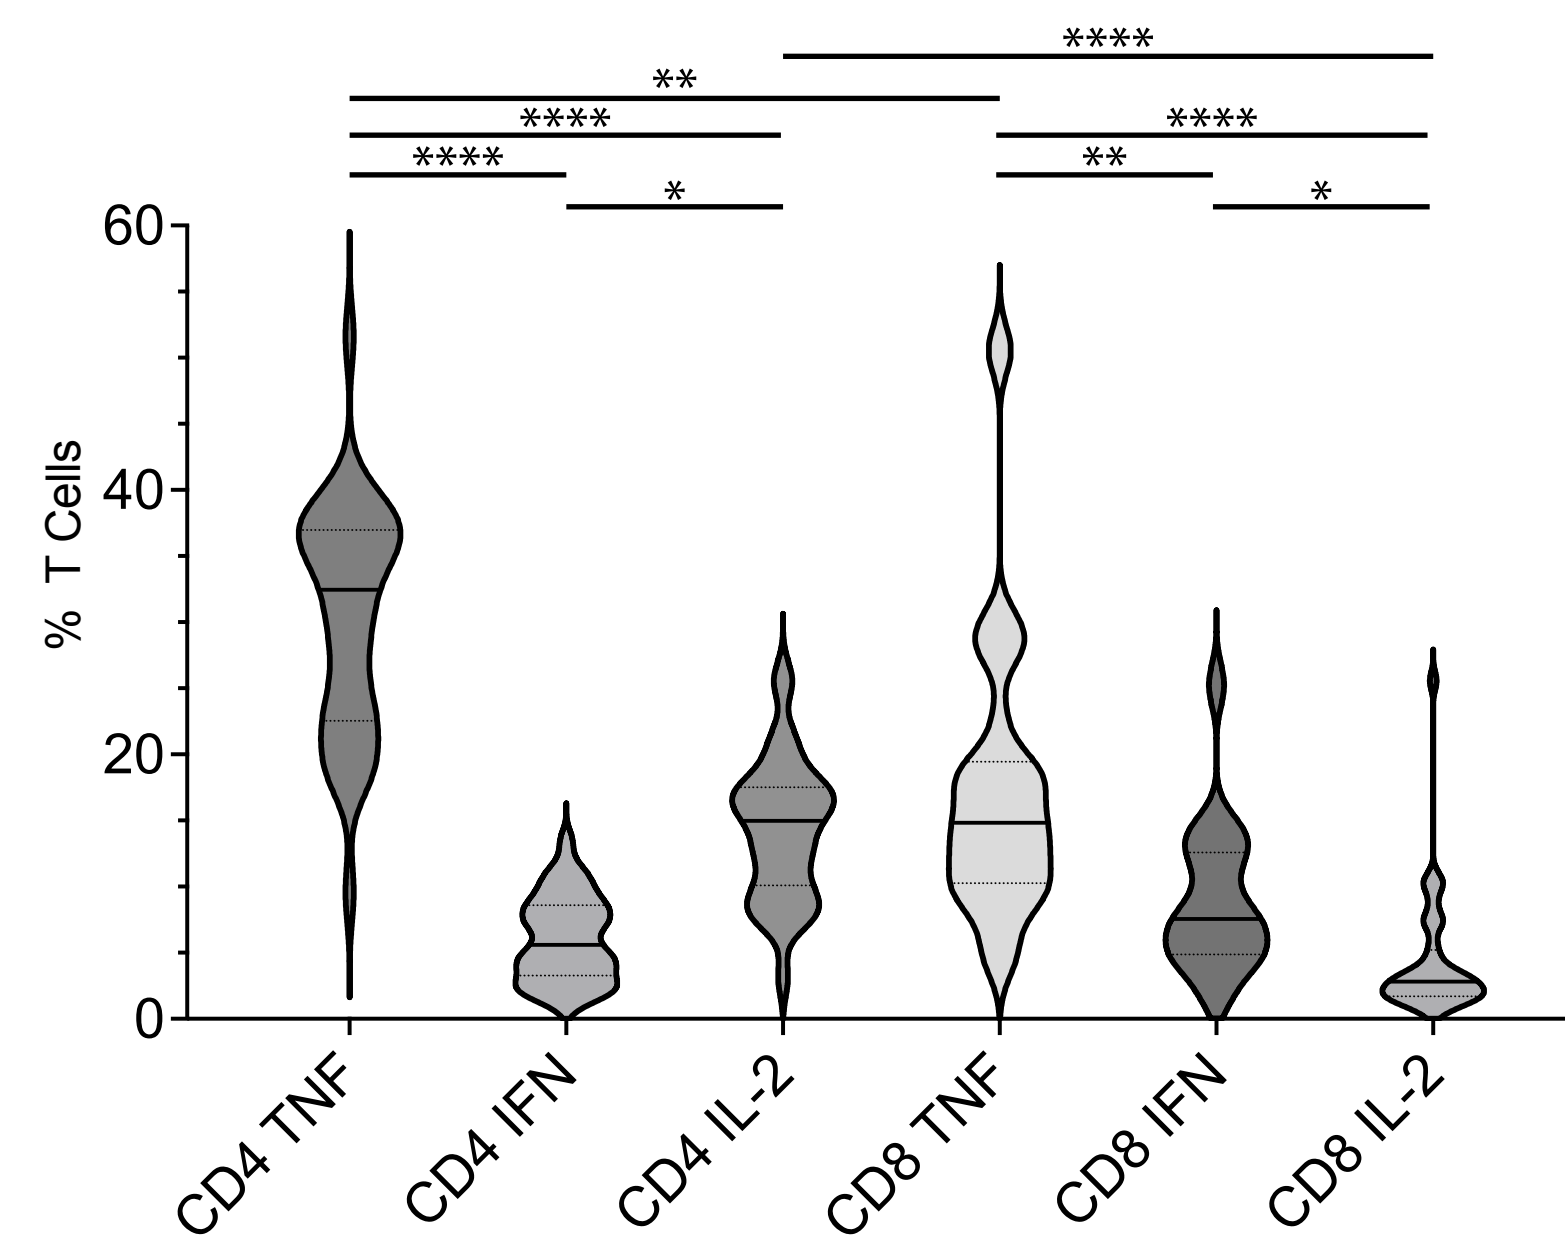

Supplement: Supplementary file [file media-4.pdf]
