# Supplementary material for: HIV-1 latency reversal agent boosting is not limited by opioid use
Source: bioRxiv or medRxiv preprint supplement (doi:10.1101/2023.05.26.23290576), 2024-06-04

Supplementary Figure 8

**a.**

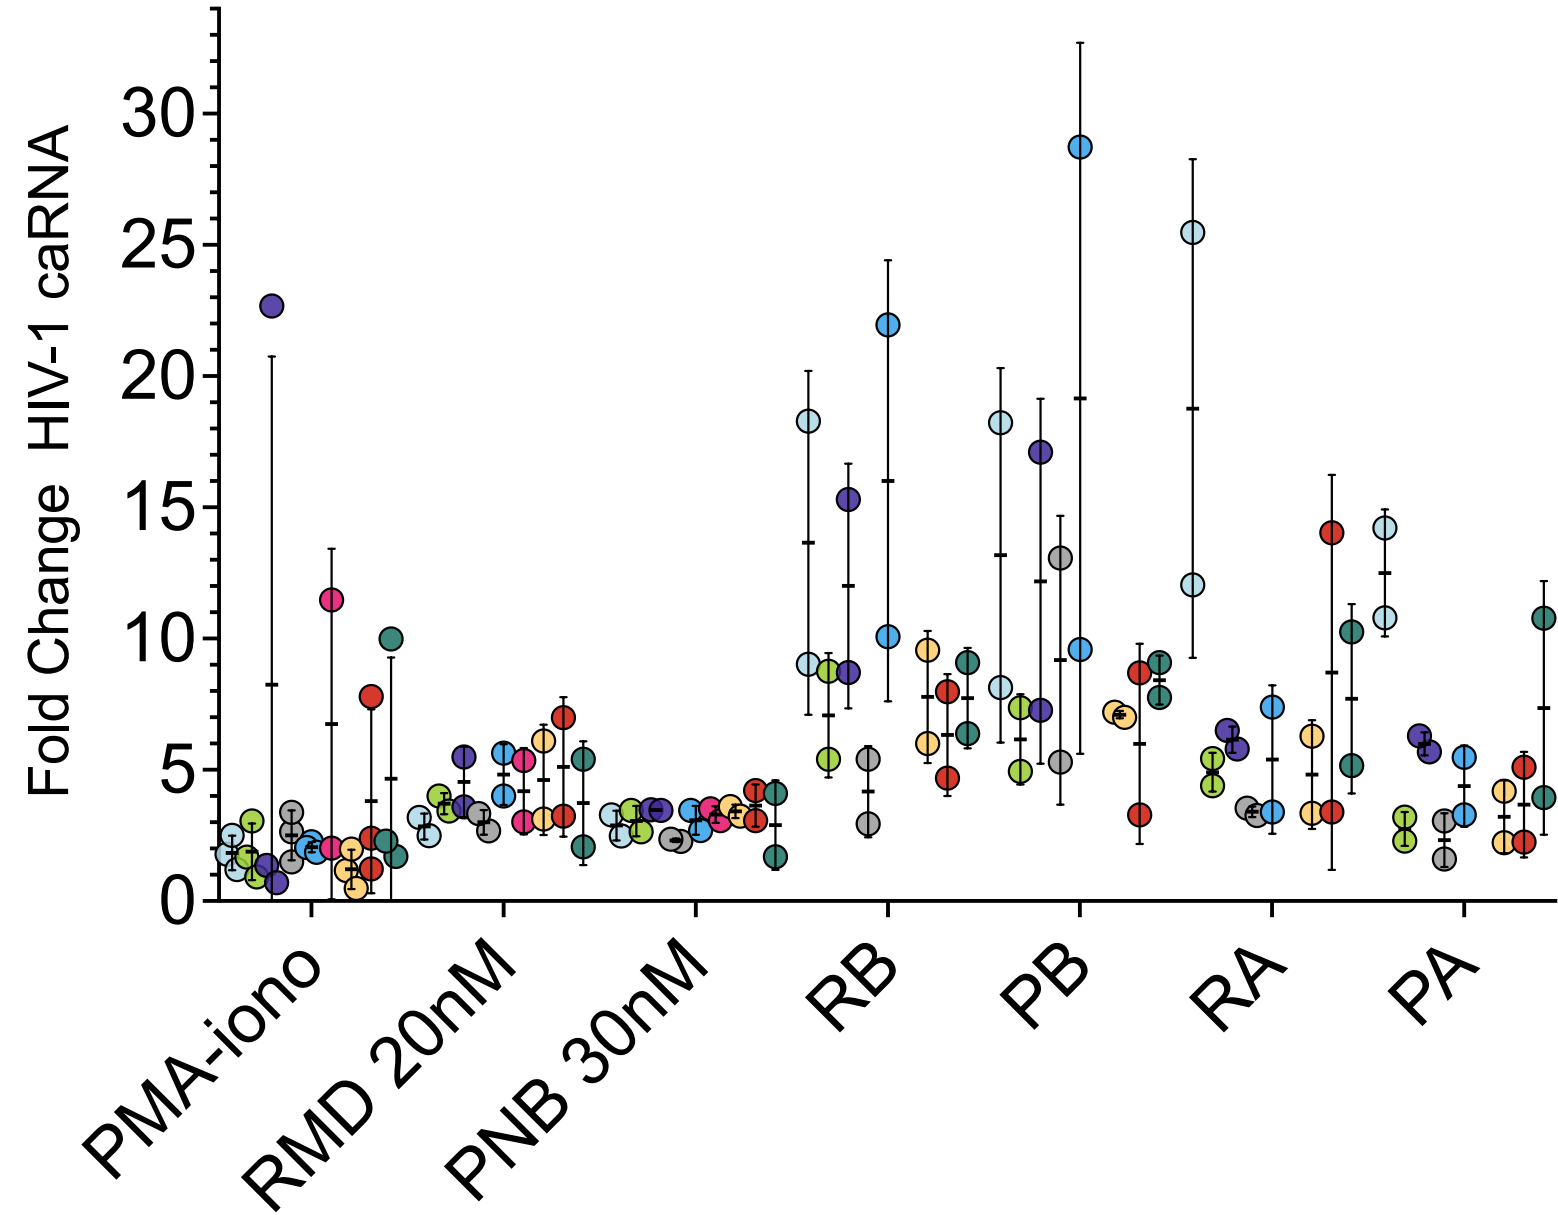

**b.**

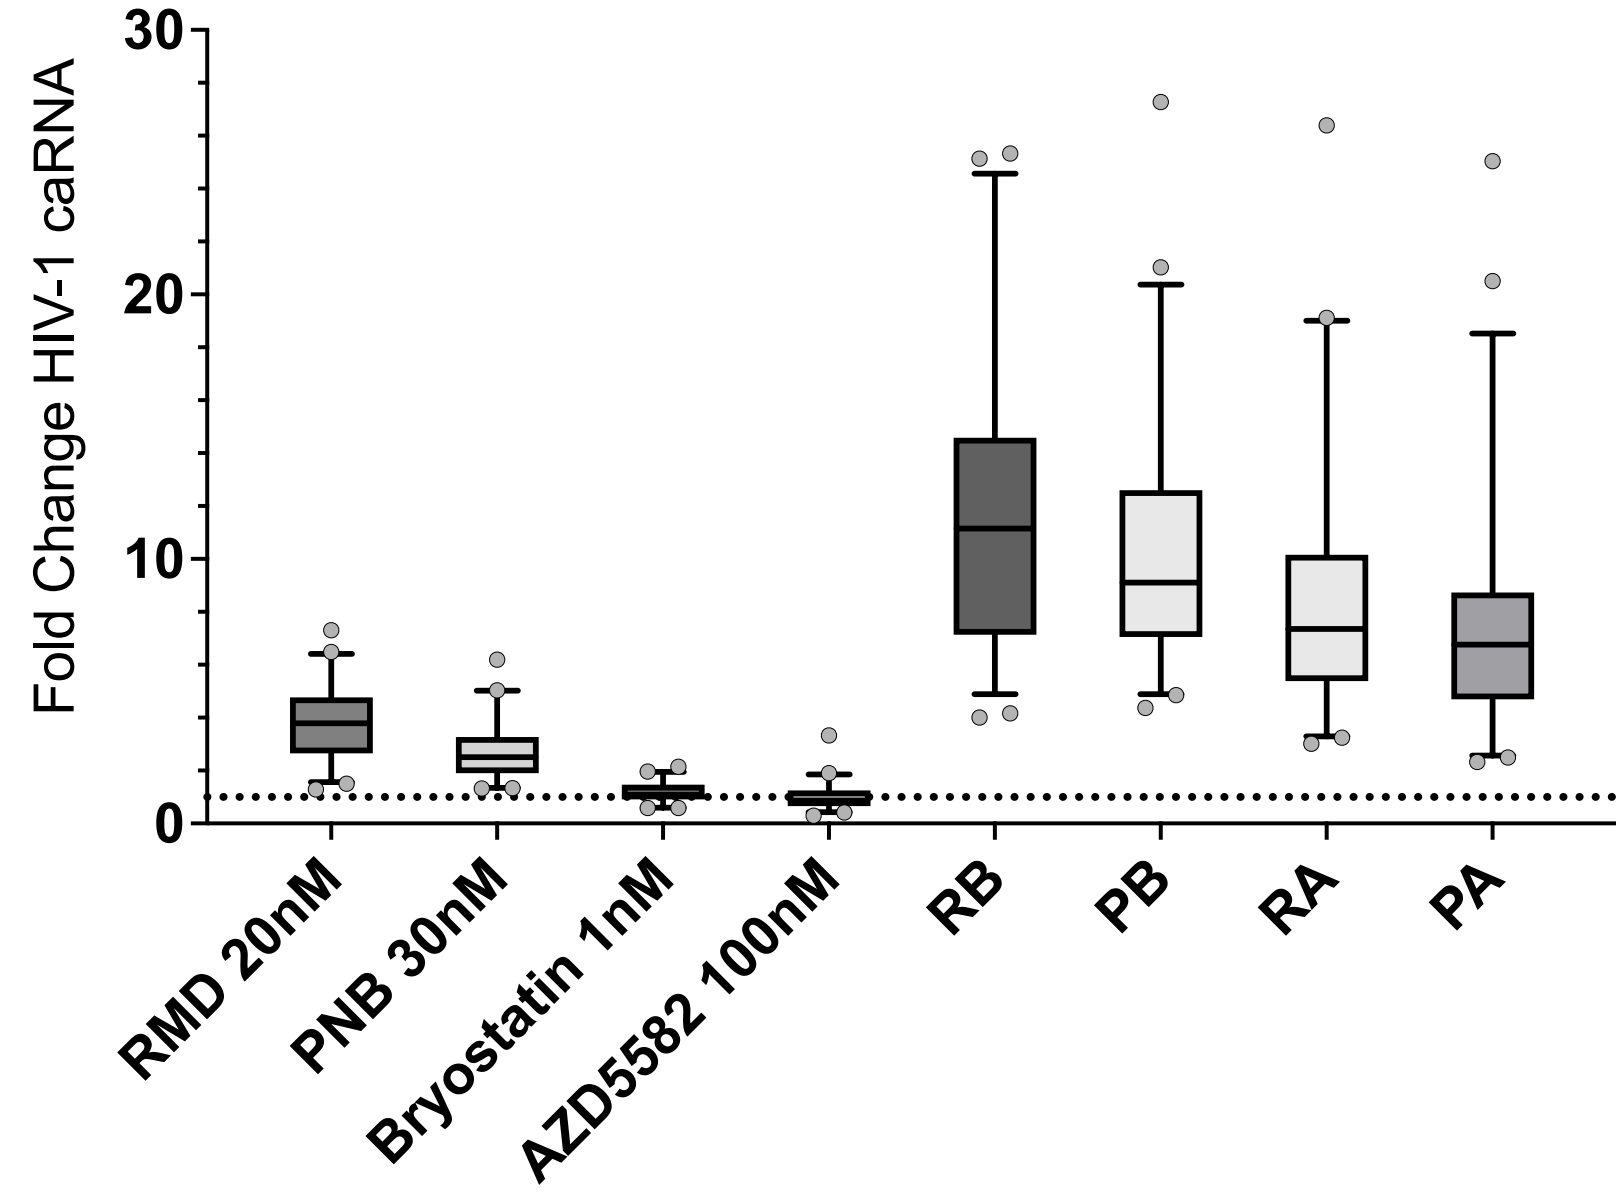

Supplement: Supplementary file [file media-8.pdf]
