# Supplementary material for: HIV-1 latency reversal agent boosting is not limited by opioid use
Source: bioRxiv or medRxiv preprint supplement (doi:10.1101/2023.05.26.23290576), 2024-06-04
Supplement: Supplementary file [file media-10.pdf]

**Supplementary Table 1. OPHION Opioid Use Sub-Group Characteristics**

| Characteristic                                            | Active injection | Methadone   | Suboxone     | Chronic Pain  | No opioid     | Total*       |
|-----------------------------------------------------------|------------------|-------------|--------------|---------------|---------------|--------------|
| Participant, N                                            | 4                | 4           | 12           | 4             | 12            | 36           |
| Age (years)<br>Median (IQR) <sup>†</sup>                  | 56 (46-61)       | 59 (55-65)  | 61 (57-67)   | 61 (57-67)    | 64 (59-65)    | 59 (54-65)   |
| Sex<br>Male N (%)                                         | 4 (100%)         | 2 (50%)     | 9 (75%)      | 2 (50%)       | 7 (58%)       | 24 (67%)     |
| Race<br>Black N (%)                                       | 1 (25%)          | 1 (25%)     | 3 (25%)      | 1 (25%)       | 9 (75%)       | 15 (42%)     |
| White N (%)                                               | 1 (25%)          | 2 (50%)     | 6 (50%)      | 2 (50%)       | 2 (17%)       | 11 (31%)     |
| Hispanic/Latino N (%)                                     | 0                | 1 (25%)     | 1 (8.3%)     | 0             | 1 (8%)        | 3 (8%)       |
| American Indian N (%)                                     | 0                | 0           | 0            | 1 (25%)       | 0             | 1 (3%)       |
| Declined/NA                                               | 2 (50%)          | 2 (50%)     | 2 (17%)      | 0             | 0             | 6 (17%)      |
| Ethnicity<br>Non-Hispanic N (%)                           | 2 (50%)          | 1 (25%)     | 7 (58%)      | 3 (75%)       | 11 (92%)      | 24 (67%)     |
| Hispanic N (%)                                            | 2 (50%)          | 3 (75%)     | 5 (42%)      | 1 (25%)       | 1 (8%)        | 12 (33%)     |
| ART Duration (months)<br>Median (IQR)                     | 146 (96-209)     | 94 (79-111) | 132 (81-167) | 173 (161-188) | 162 (106-204) | 144 (97-179) |
| Duration of virus<br>suppression (months)<br>Median (IQR) | 76 (51-96)       | 62 (35-95)  | 79 (64-89)   | 77 (41-101)   | 70 (38-91)    | 75 (44-93)   |

\*Percentage totals may not add up to 100 due to rounding. <sup>†</sup>IQR, interquartile range
