# Supplementary material for: HIV-1 latency reversal agent boosting is not limited by opioid use
Source: bioRxiv or medRxiv preprint supplement (doi:10.1101/2023.05.26.23290576), 2024-06-04
Supplement: Supplementary file [file media-11.pdf]

**Supplementary Table 2. HEAL Participant Characteristics**

---

| <b>Characteristic</b>                  | <b>Cohort</b> |
|----------------------------------------|---------------|
| Participants, N                        | 11            |
| Age                                    |               |
| Median (IQR <sup>†</sup> )             | 56 (55-62)    |
| Sex                                    |               |
| Male (%)                               | 7 (64%)       |
| Race                                   |               |
| Black N (%)                            | 6 (55%)       |
| White N (%)                            | 3 (27%)       |
| Hispanic/Latino** N (%)                | 0             |
| American Indian N (%)                  | 0             |
| Other                                  | 2 (18%)       |
| Ethnicity                              |               |
| Non-Hispanic N (%)                     | 9 (82%)       |
| Hispanic N (%)                         | 2 (18%)       |
| Duration of viral suppression (months) |               |
| Median (IQR)                           | 66 (26-83)    |

---

<sup>†</sup>IQR, interquartile range. \*\* Participants who reported Hispanic ethnicity identified their race as “Other.”
